# Supplementary material for: A Novel Mechanism for Intermediate Intra-Slab Earthquakes: Crustal Dense Block Controls in the 2020–2024 San Pedro Seismic Sequence, Chile
Source: Research Square preprint supplement (doi:10.21203/rs.3.rs-7133276/v1), 2025-10-10
Supplement: Supplementary file 1 [file 4763eead6e204b379c304ba9.docx]

Supporting Information for

**A Novel Mechanism for Intermediate Intra-Slab Earthquakes: Crustal Dense Block Controls in the 2020–2024 San Pedro Seismic Sequence, Chile**

Mahesh N Shrivastava1,2,3, Gonzalo Yáñez4, Rodrigo González1,2, Pablo Salazar1,2 Sanjay K Prajapati5 and Juan Carlos Baez6

1Universidad Católica del Norte, Antofagasta, Chile

2Millenium Institute on Volcanic Risk Research - Ckelar Volcanoes, Antofagasta, Chile

3National Research Center for Integrated Natural Disaster Management, Chile

4Pontificia Universidad Católica de Chile, Santiago, Chile

5National Center for Seismology, Ministry of Earth Sciences, India

6Centro Sismológico Nacional, Universidad de Chile, Santiago, Chile

**Contents of this file**

Figure S1 to S4

Tables S1 to S2


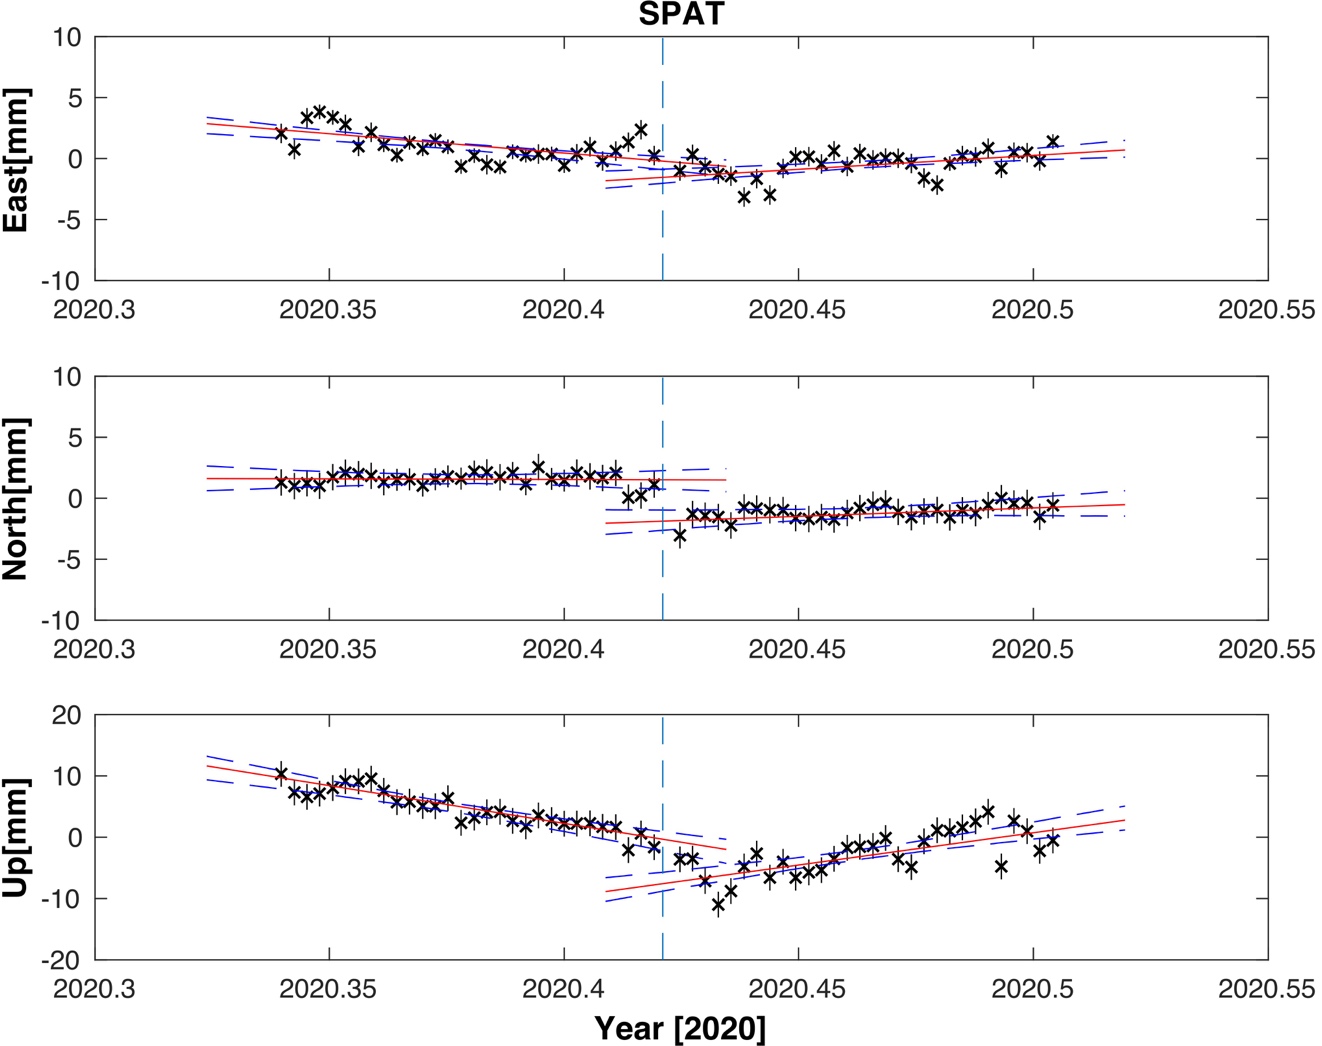


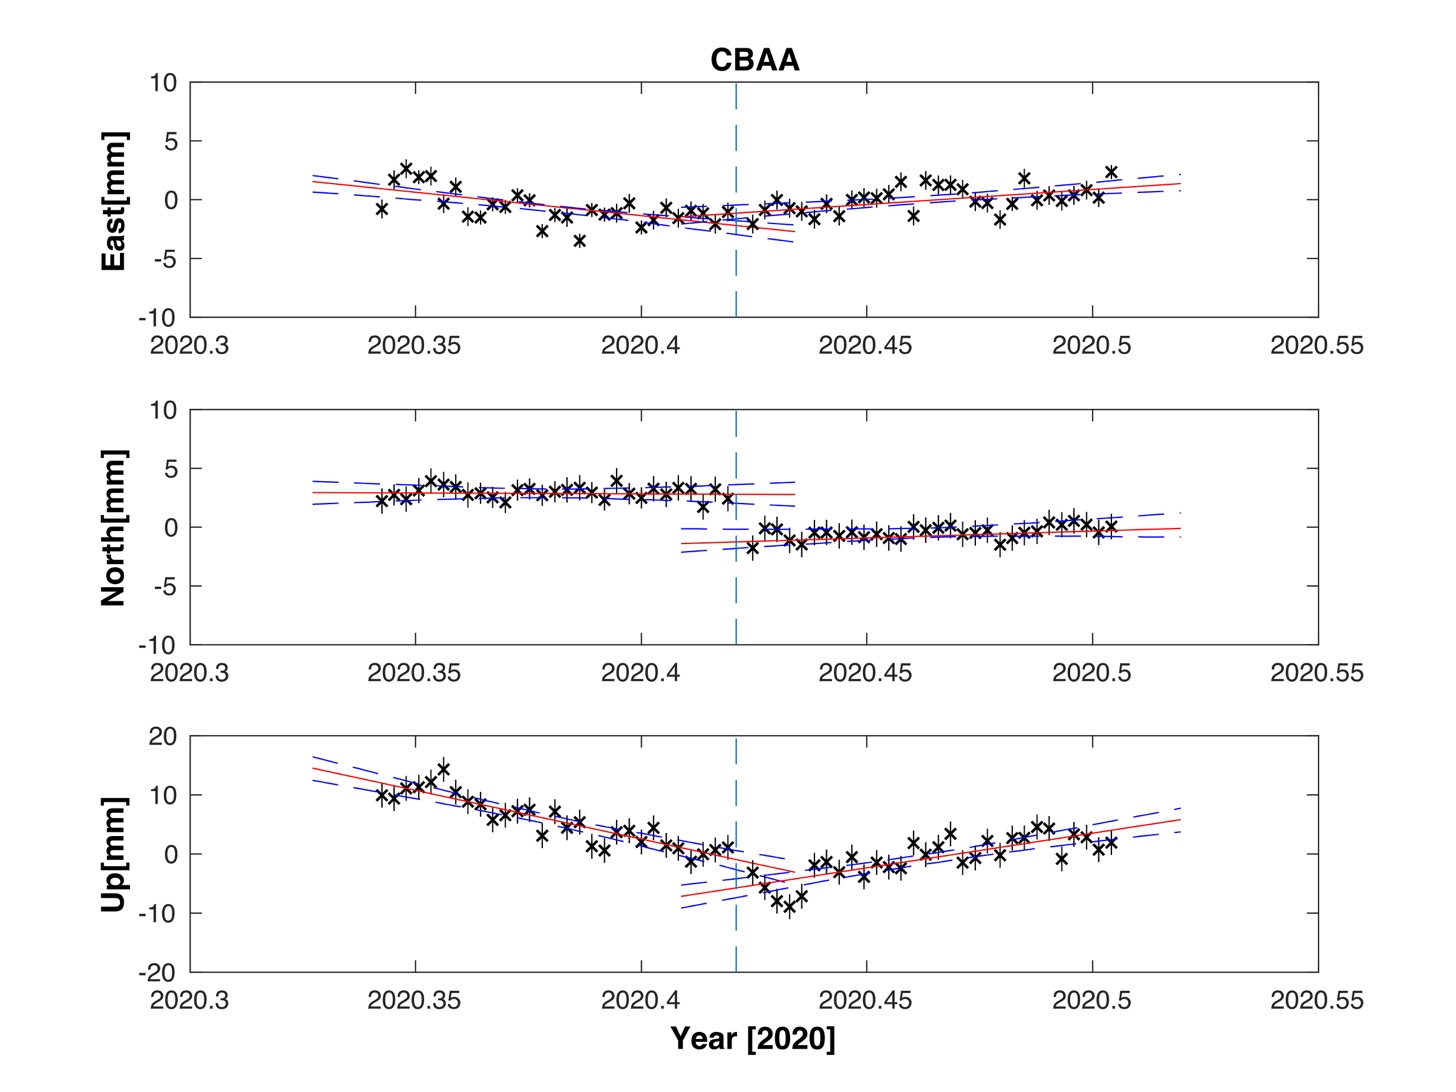


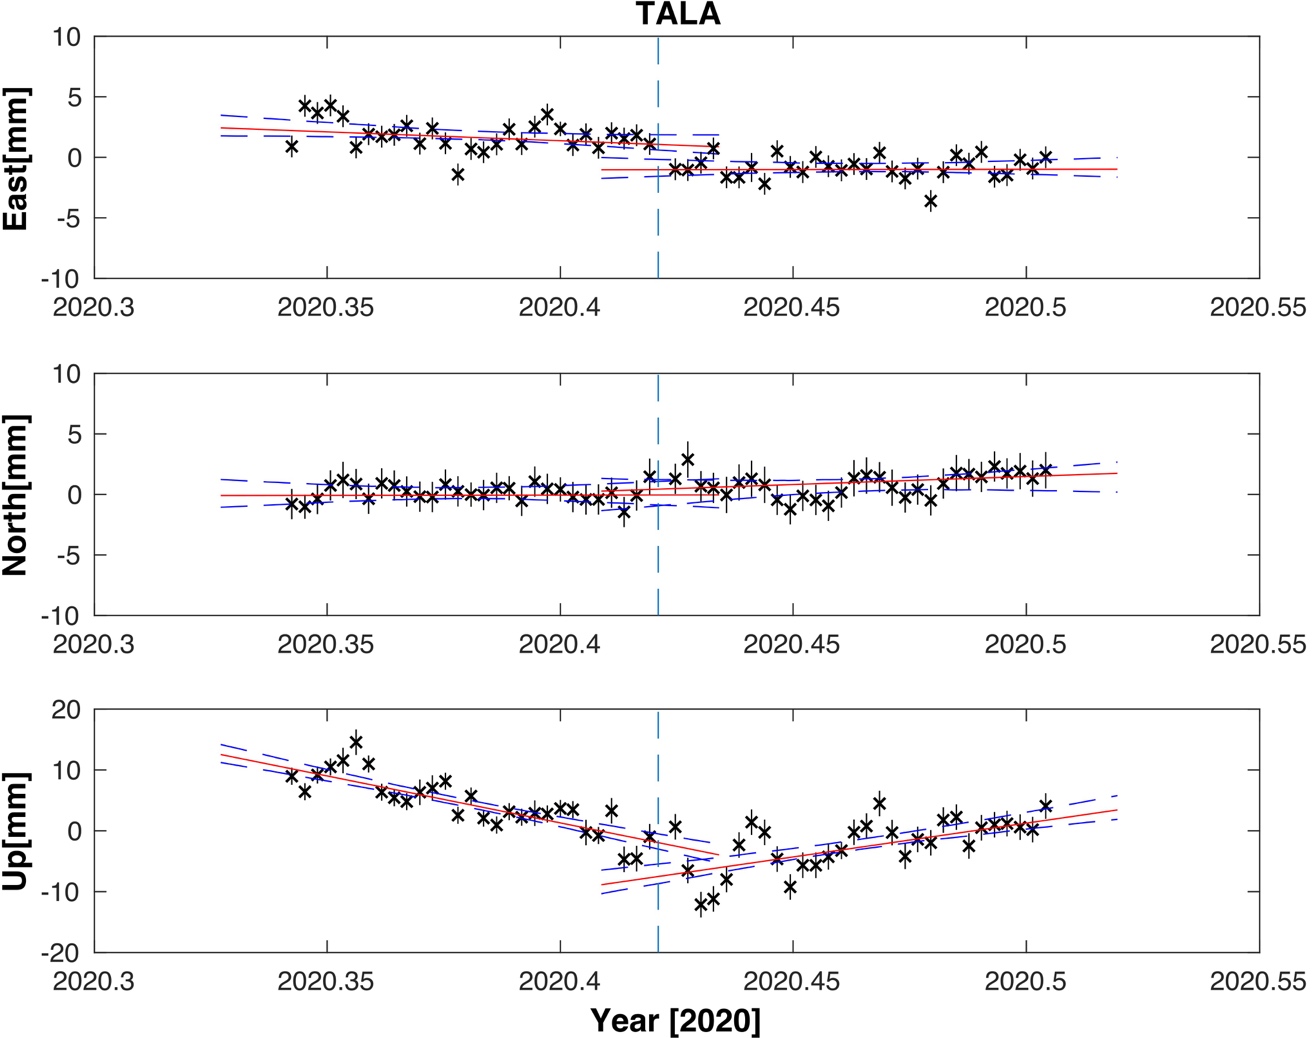


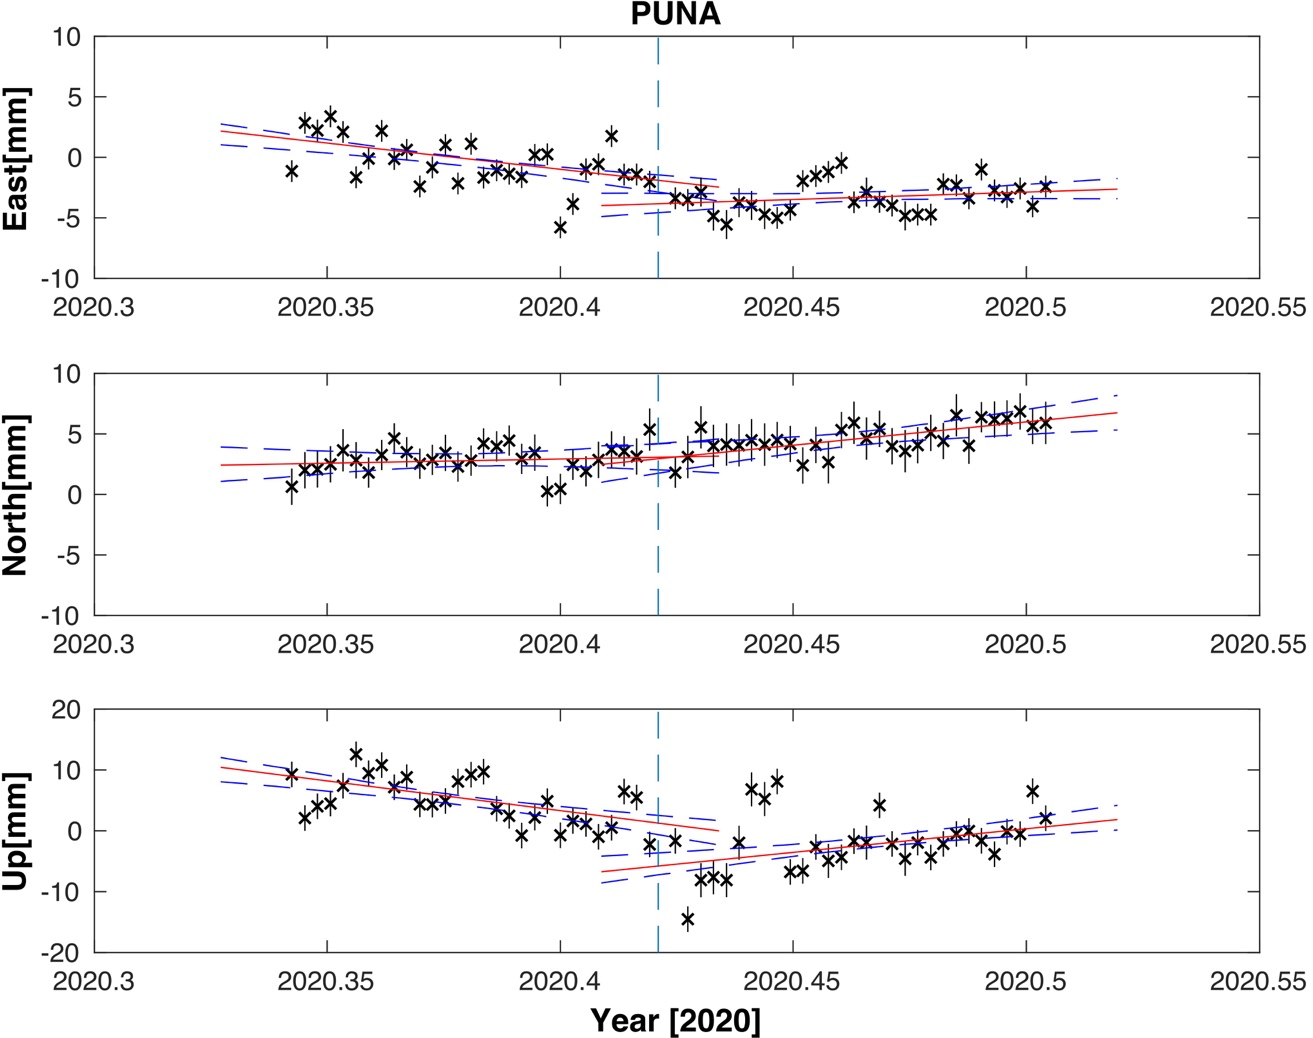


**Figure S1:** Figures are shown all the GPS time series 30 -days before and 30-days later the San Pedro Earthquake June 3, 2020 repeatability with errors, which we used to represent the East North and vertical deformation.


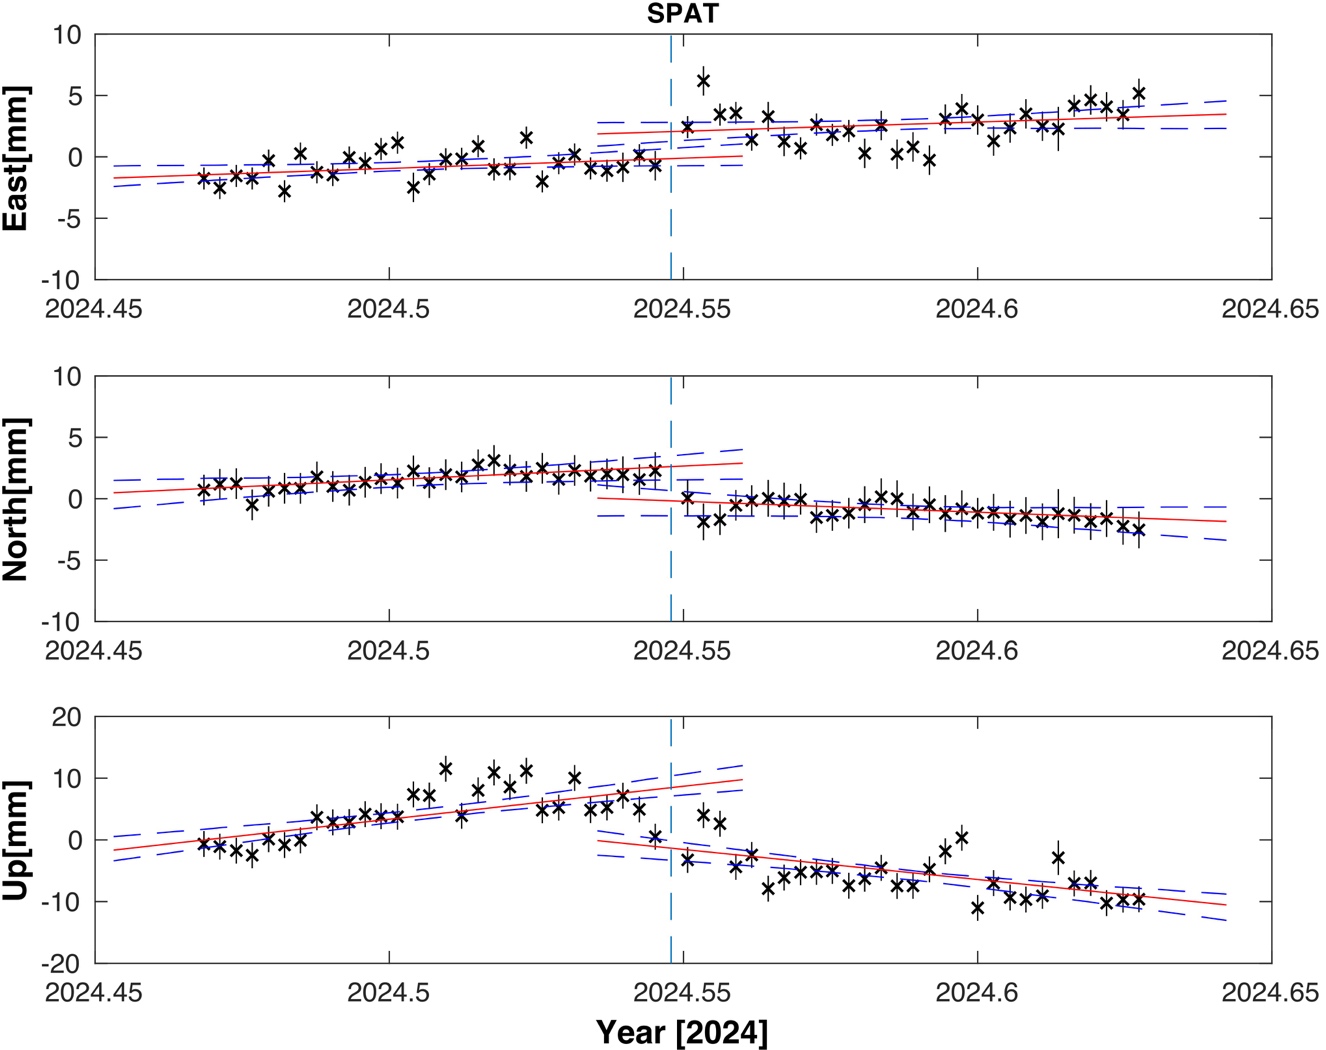


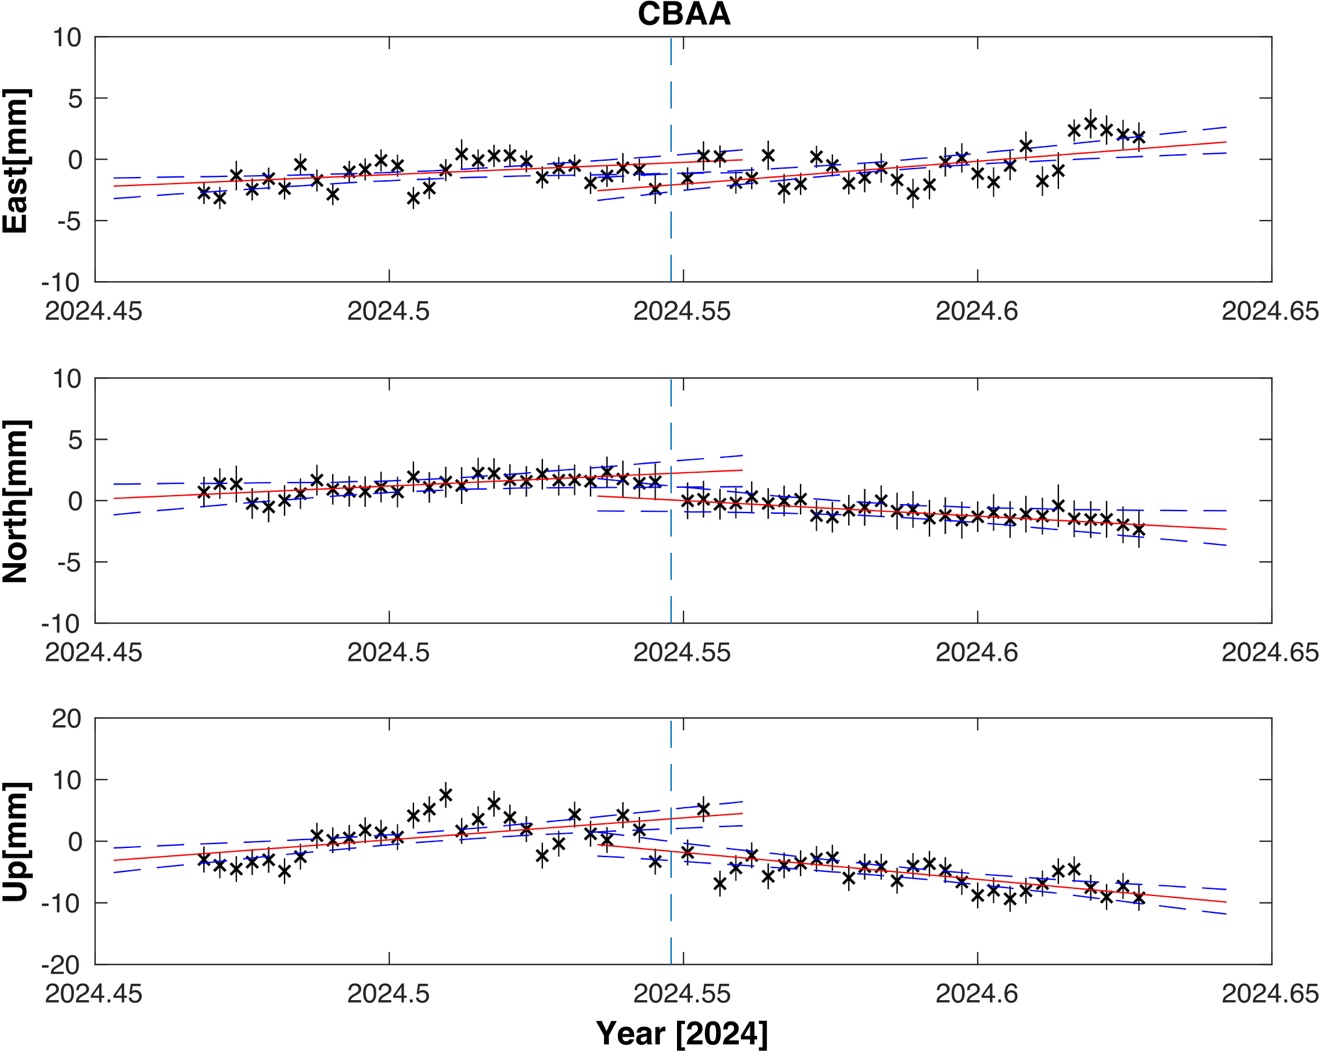


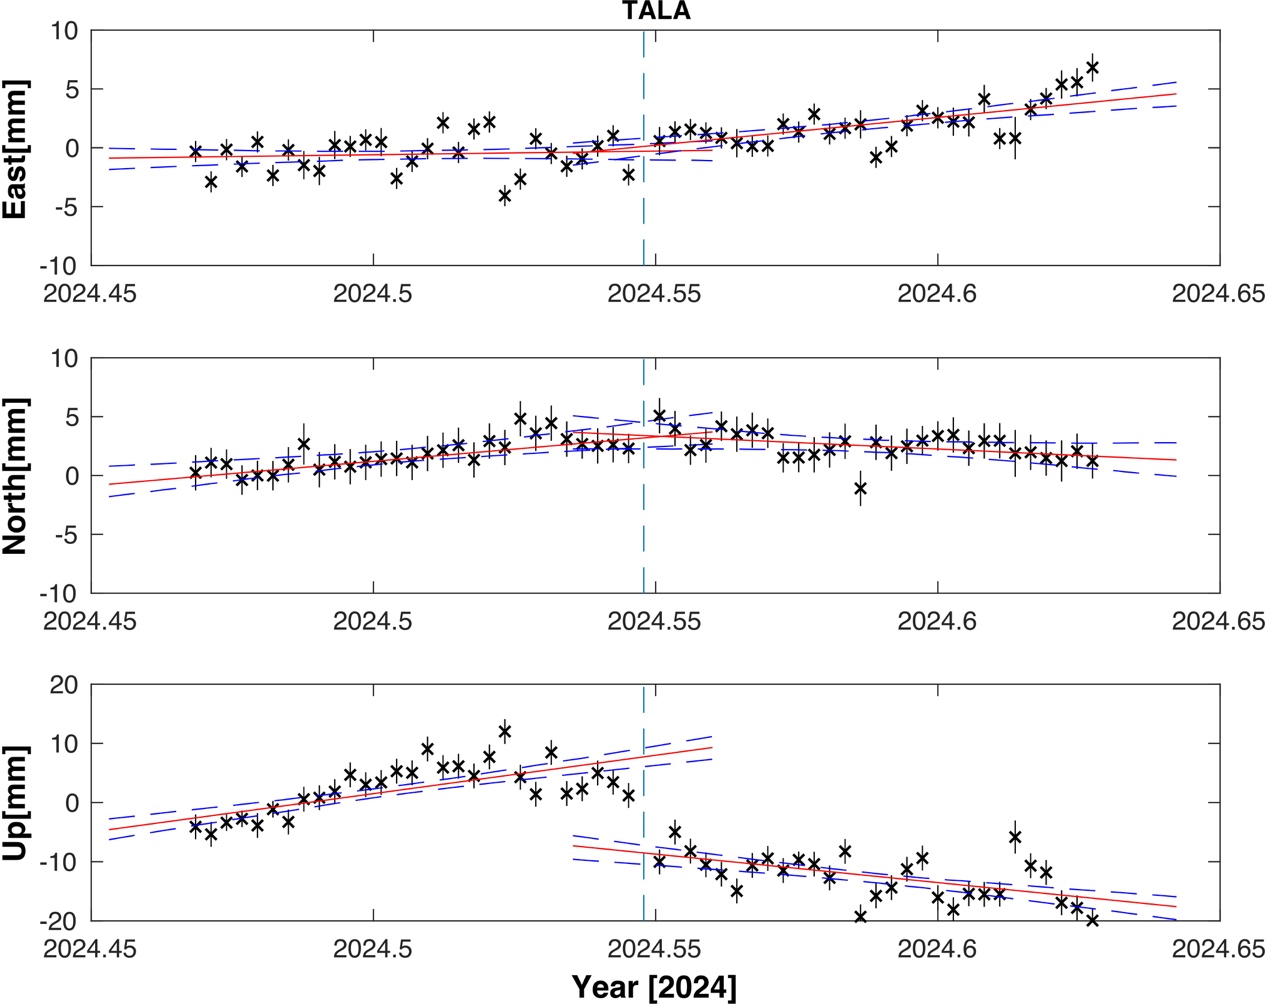


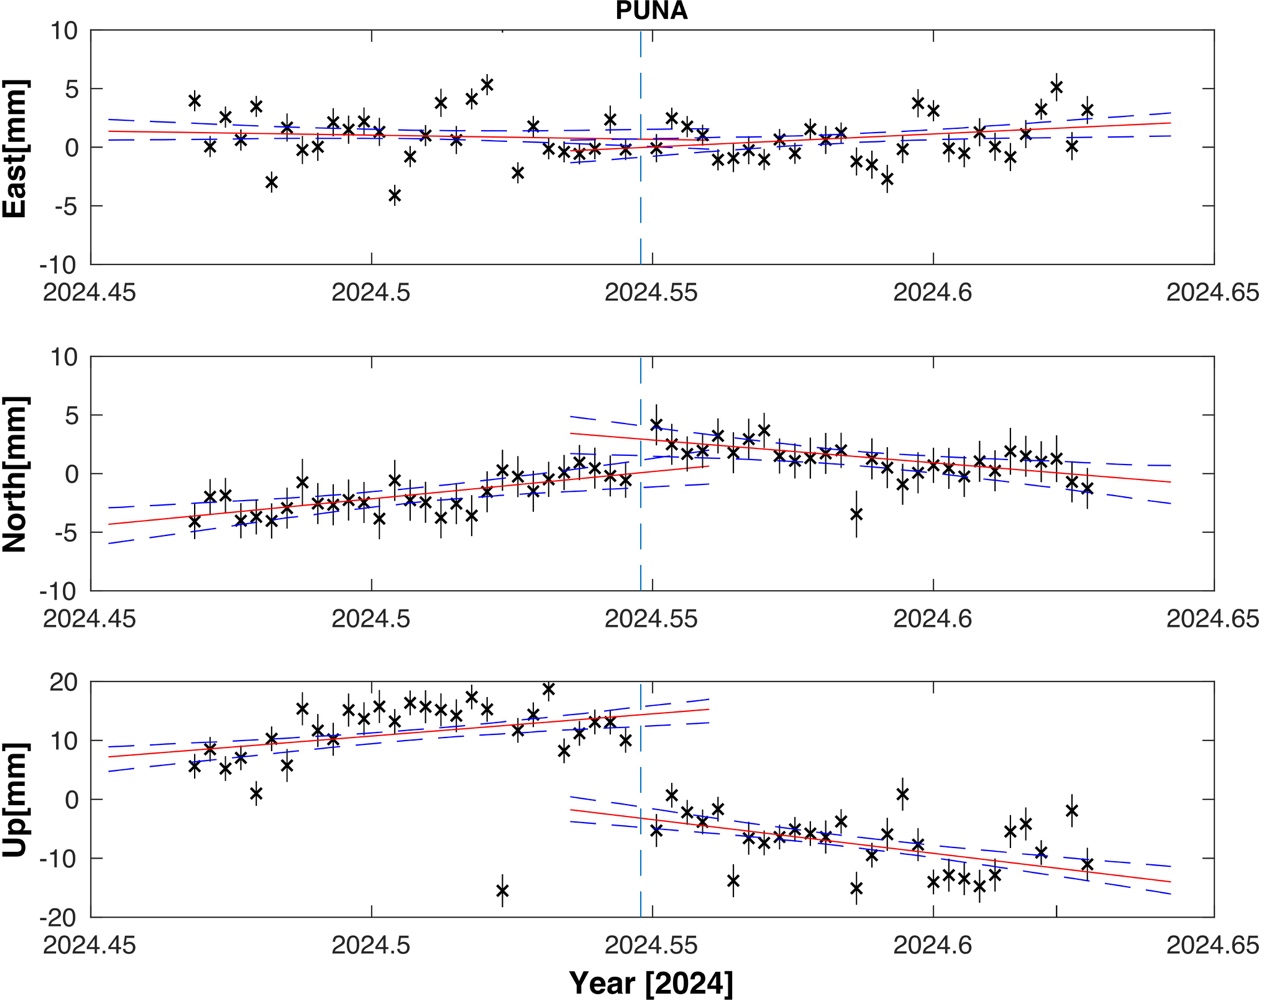


**Figure S2:** Figures are shown all the GPS time series 30 -days before and 30-days later the San Pedro Earthquake July 19, 2024 repeatability with errors, which we used to represent the East North and vertical deformation.


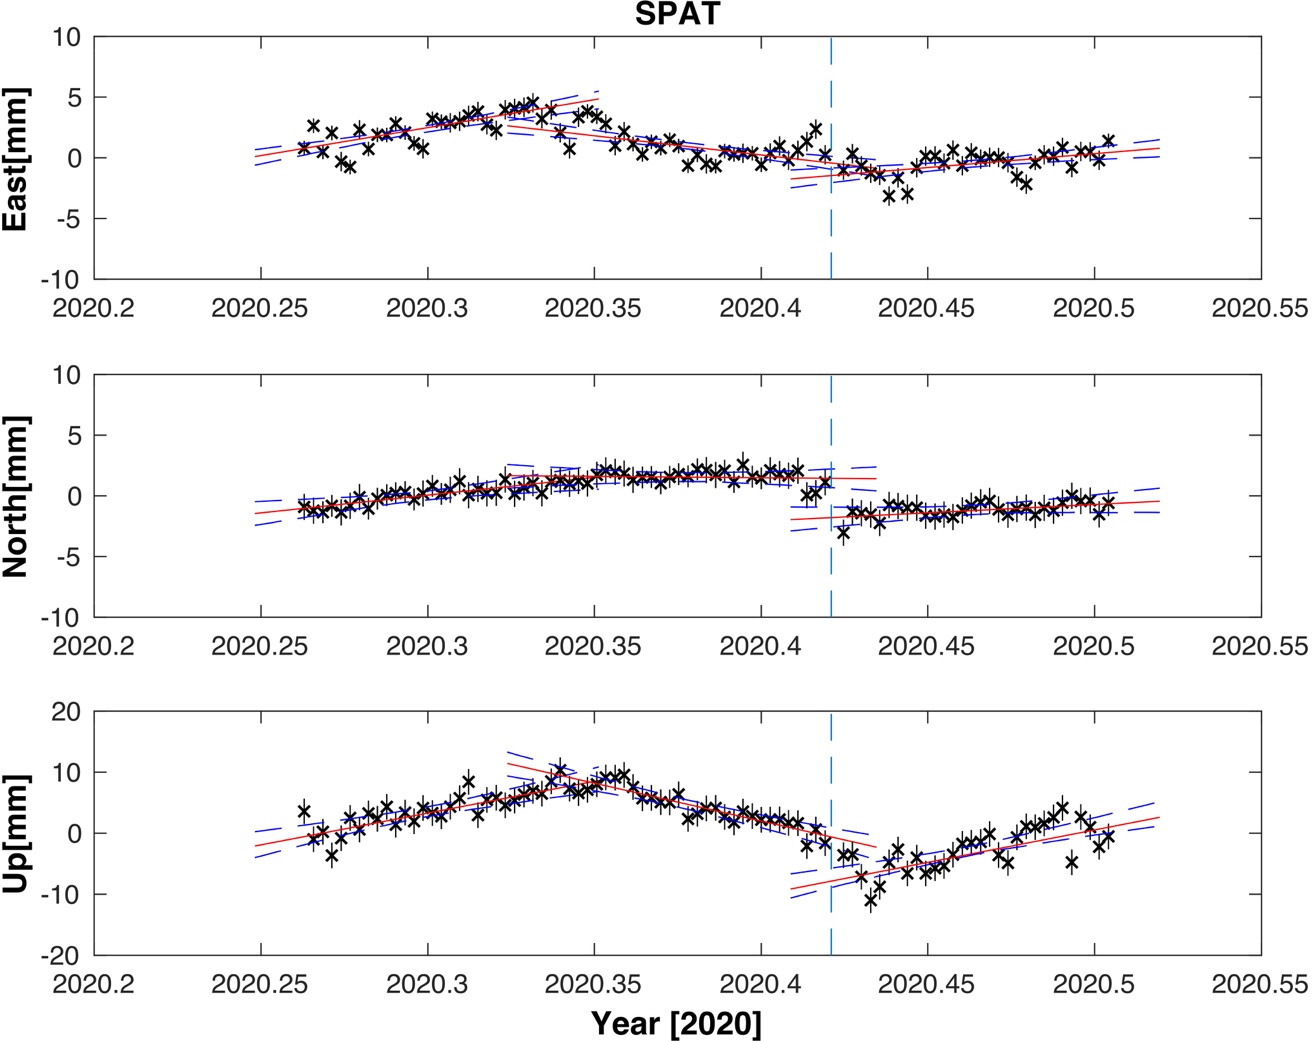


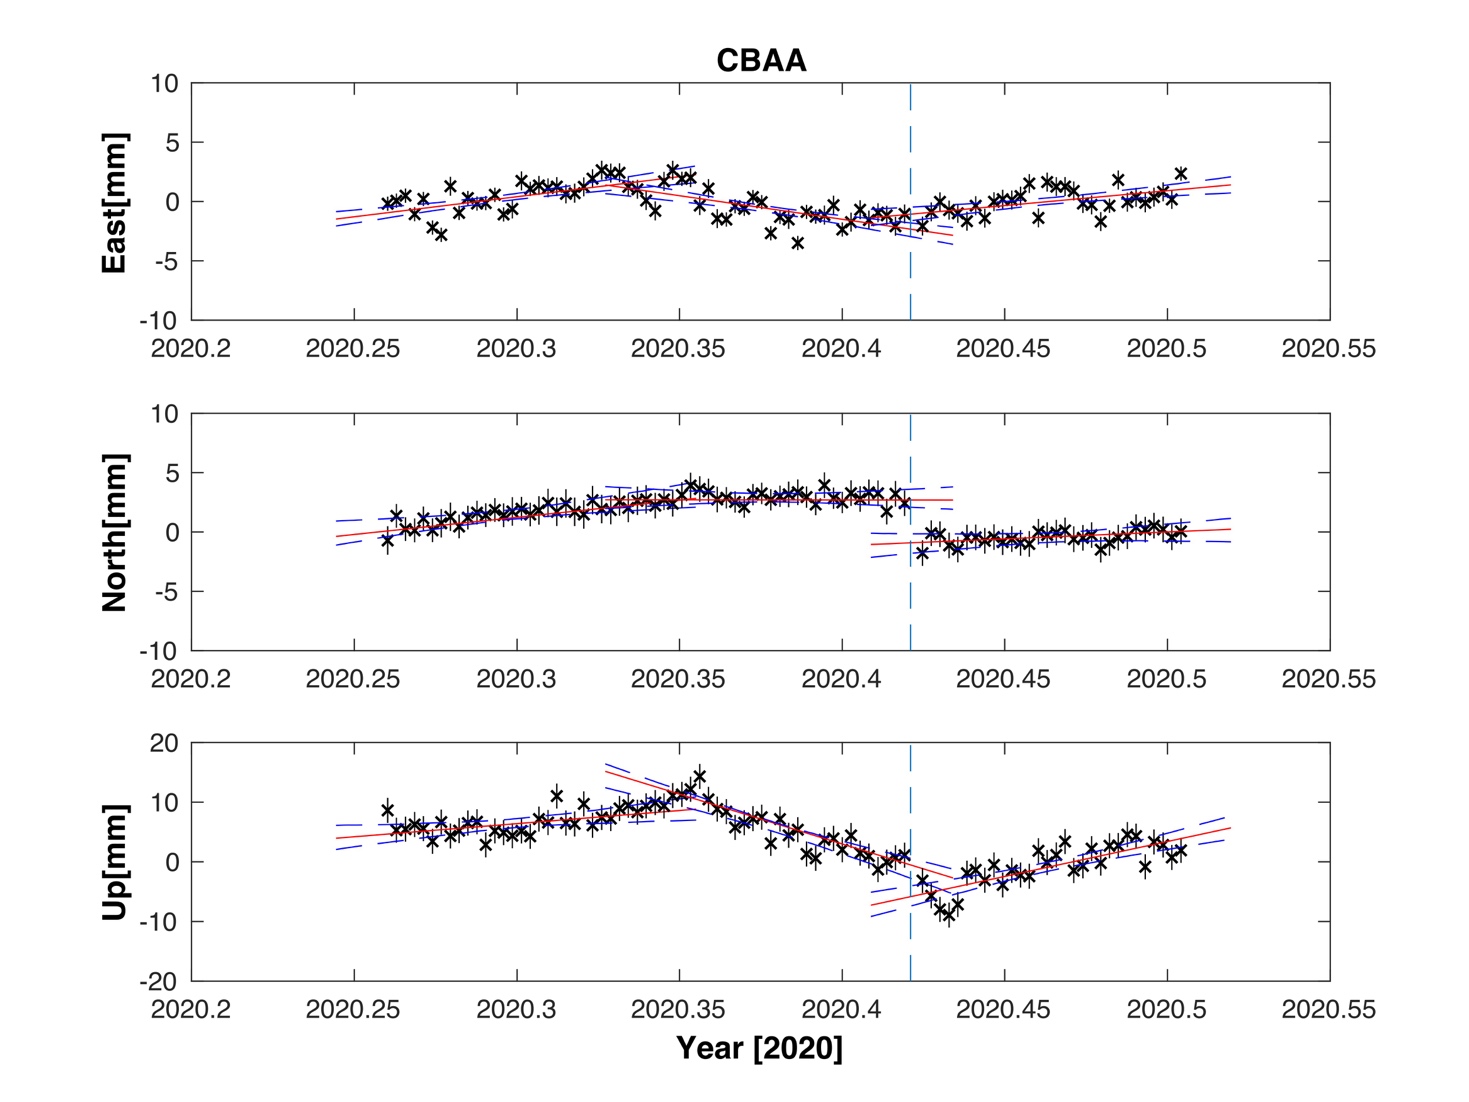


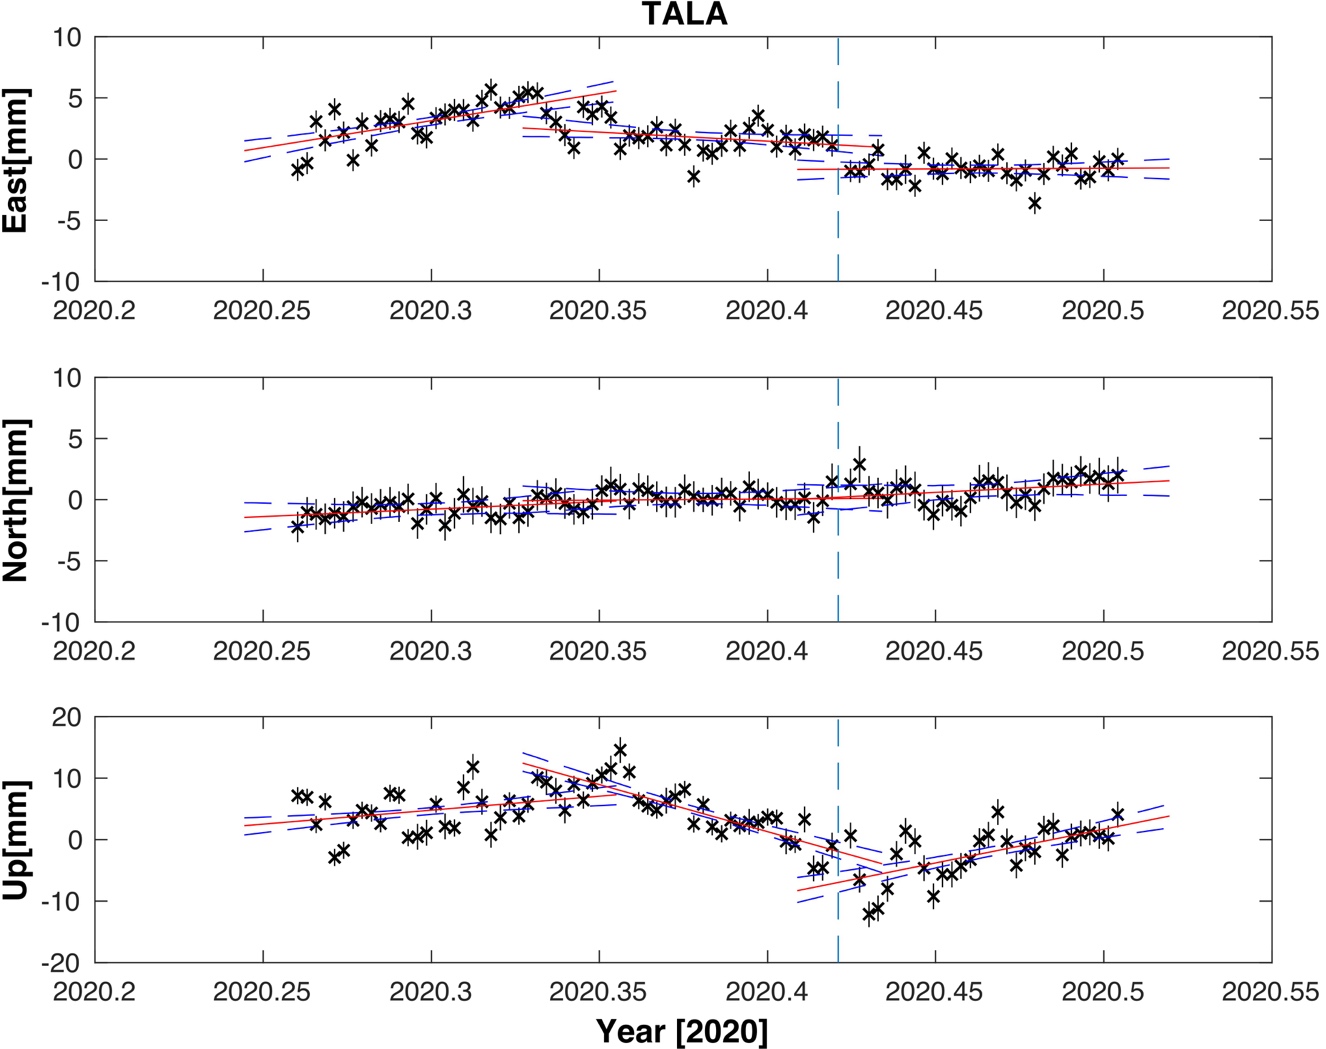


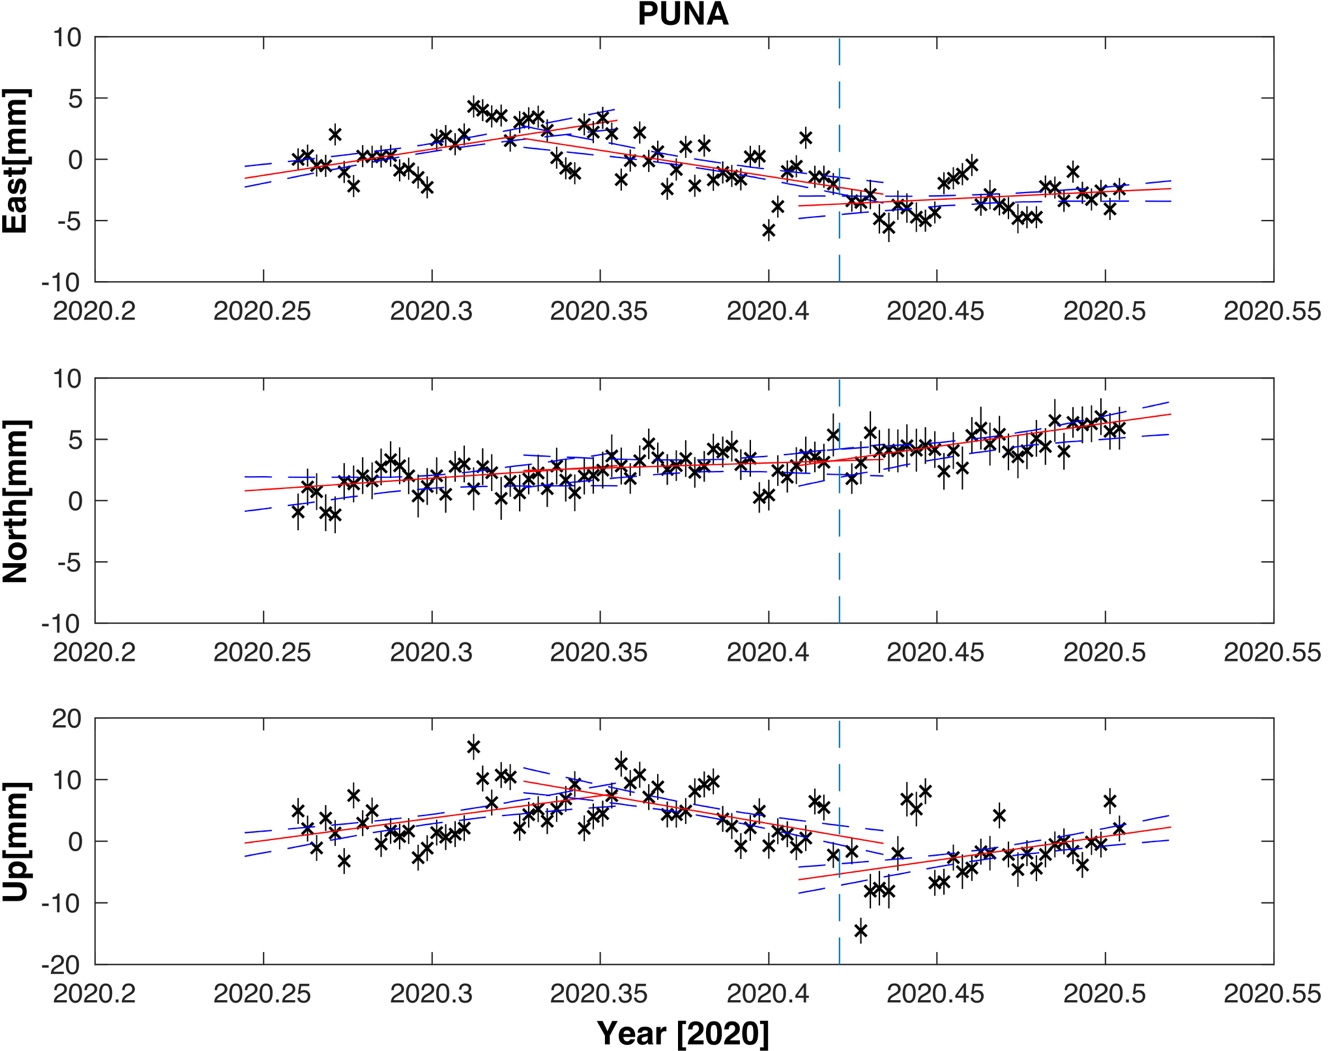


**Figure S3:** Figures are shown all the GPS time series 60 -days before and 30-days later the San Pedro Earthquake June 3, 2020 repeatability with errors, which we used to represent the East North and vertical deformation.


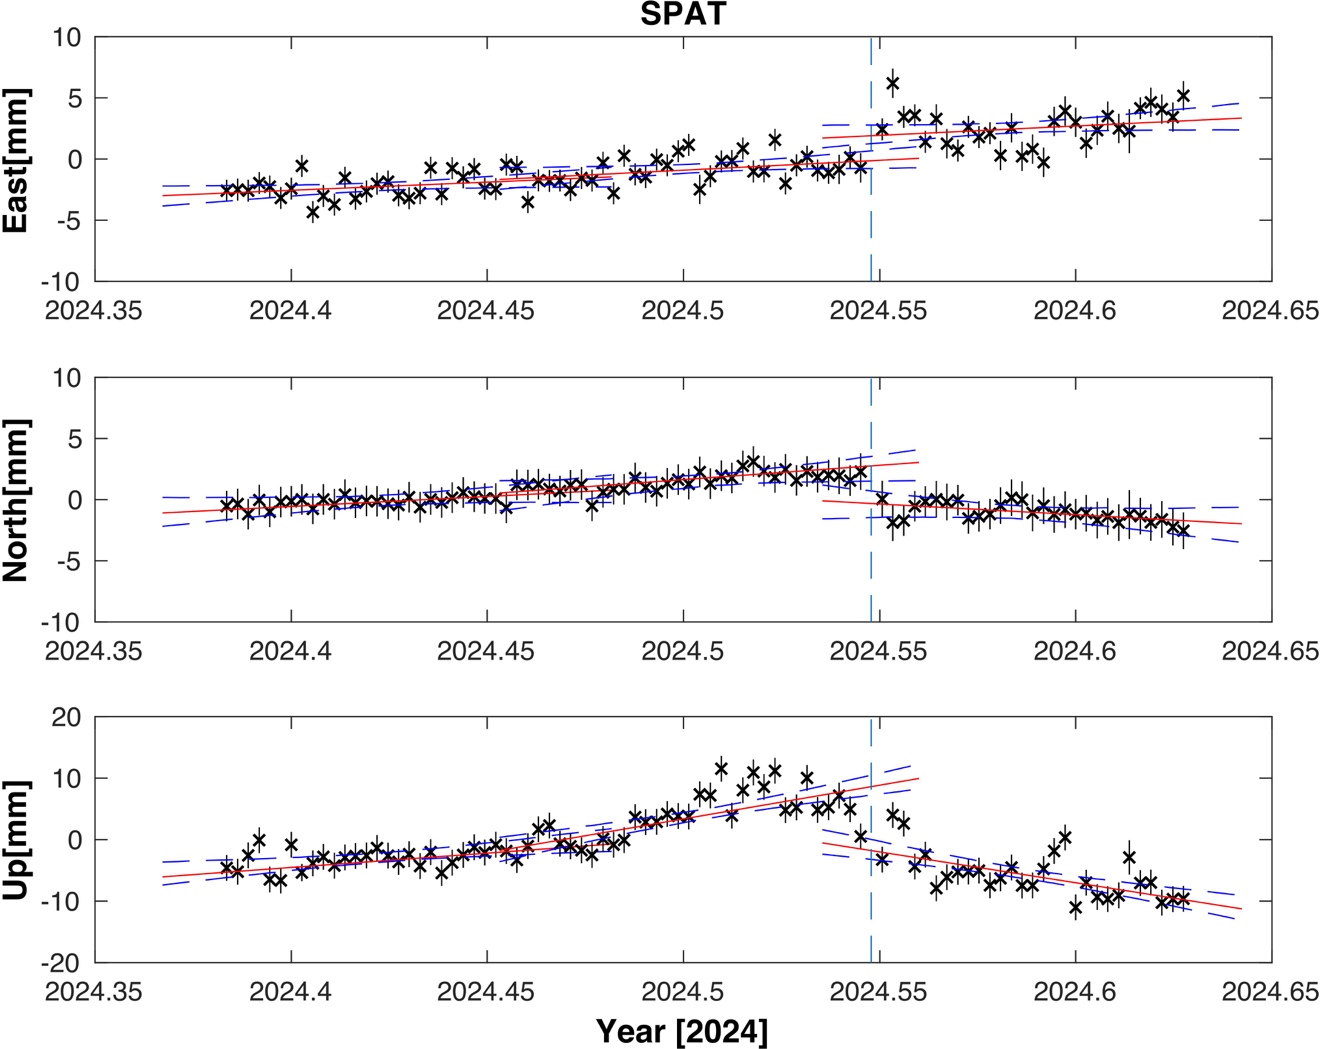


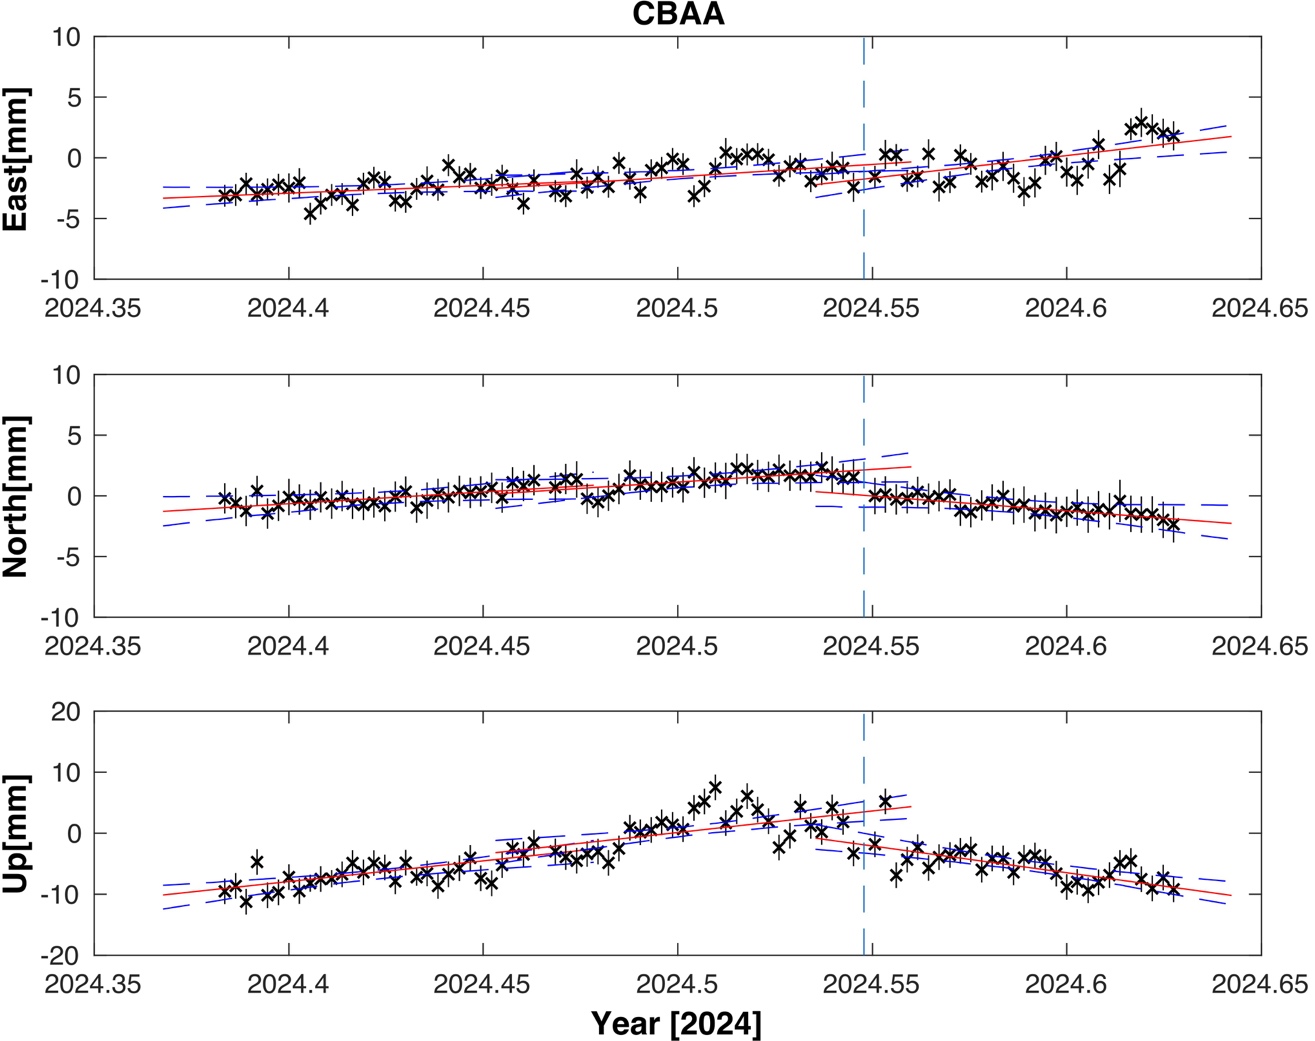


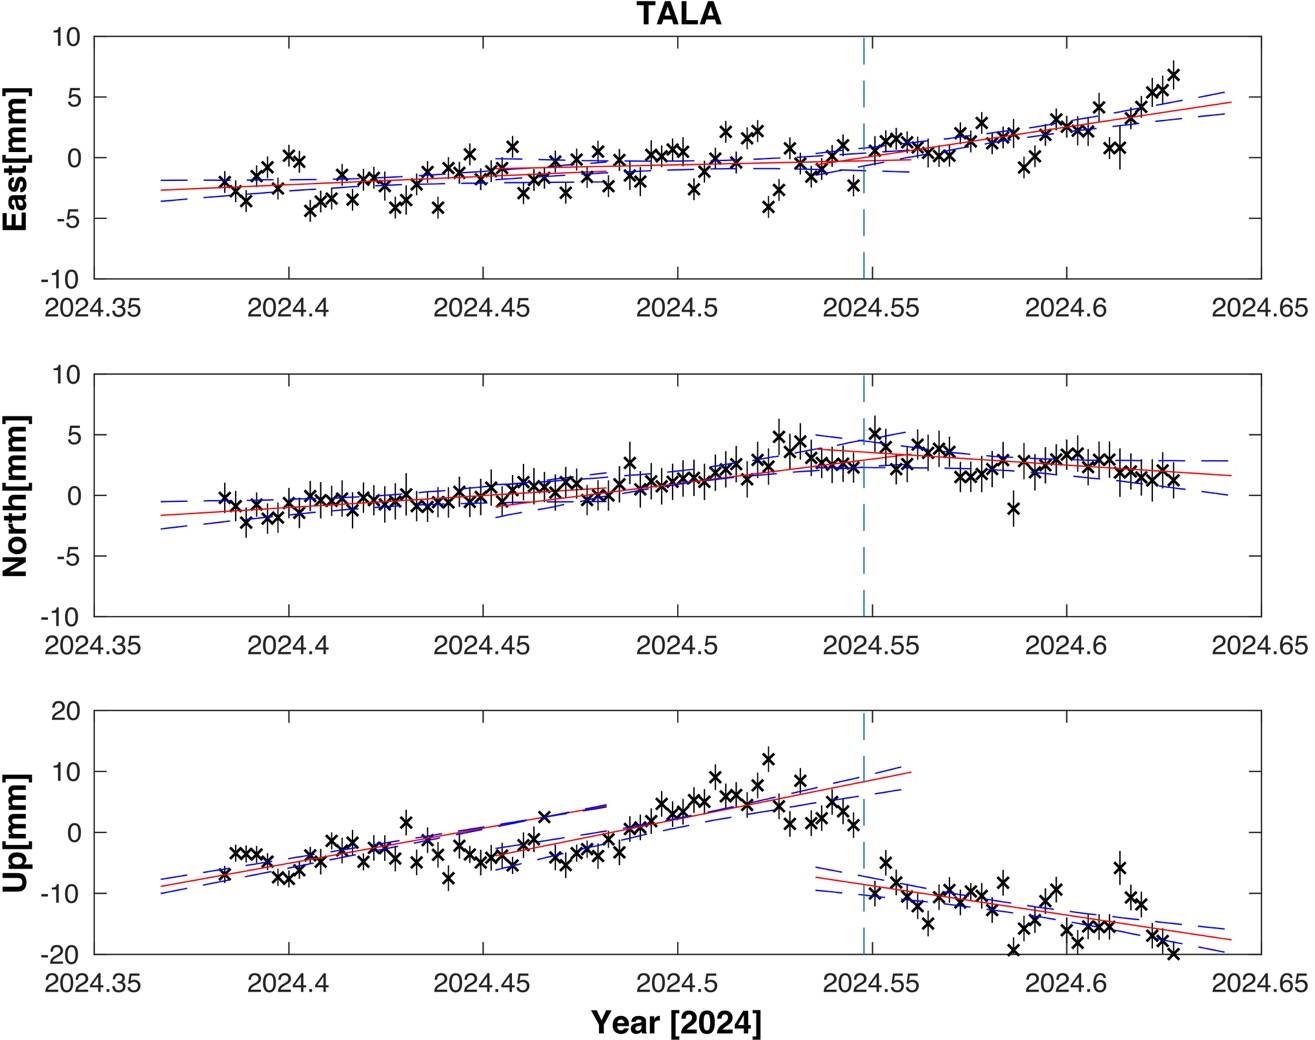


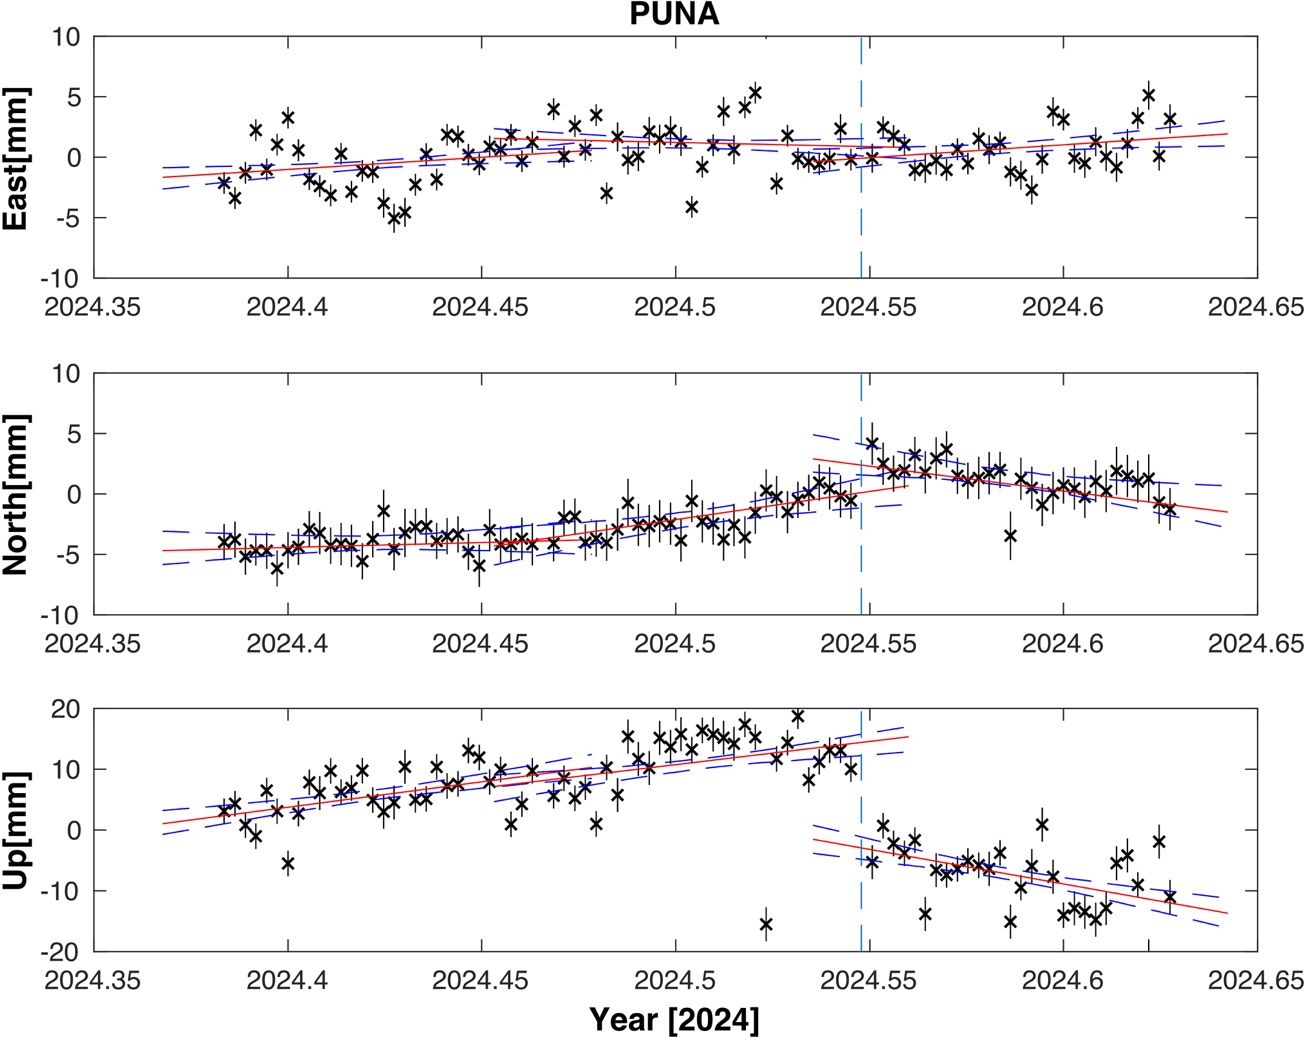


**Figure S4:** Figures are shown all the GPS time series 60 -days before and 30-days later the San Pedro Earthquake July 19, 2024 repeatability with errors, which we used to represent the East North and vertical deformation.

**Table S1: Distance from the epicentre of the San Pedro earthquake June 3, 2020**

| Sites Name | Longitude | Latitude | Distance(Km) |
| --- | --- | --- | --- |
| CBAA | -68.5481 | -22.6464 | 82 |
| SPAT | -68.3588 | -23.0421 | 50 |
| TALA | -67.8975 | -23.3112 | 81 |
| PUNA | -67.8418 | -23.4897 | 87 |

**Table S2: Distance from the epicentre of the San Pedro earthquake July 19, 2024**

| Sites Name | Longitude | Latitude | Distance(Km) |
| --- | --- | --- | --- |
| CBAA | -68.5481 | -22.6464 | 80 |
| SPAT | -68.3588 | -23.0421 | 39 |
| TALA | -67.8975 | -23.3112 | 21 |
| PUNA | -67.8418 | -23.4897 | 40 |
