# Supplementary material for: A Novel Mechanism for Intermediate Intra-Slab Earthquakes: Crustal Dense Block Controls in the 2020–2024 San Pedro Seismic Sequence, Chile
Source: Research Square preprint supplement (doi:10.21203/rs.3.rs-7133276/v1), 2025-10-10
Supplement: Supplementary file 2 [file 9f97309aeb34b42618dc5adf.docx]

Supporting Information for

**A Novel Mechanism for Intermediate Intra-Slab Earthquakes: Crustal Dense Block Controls in the 2020–2024 San Pedro Seismic Sequence, Chile**

**Contents of this file**

Figure S1 to S4

Tables S1 to S2


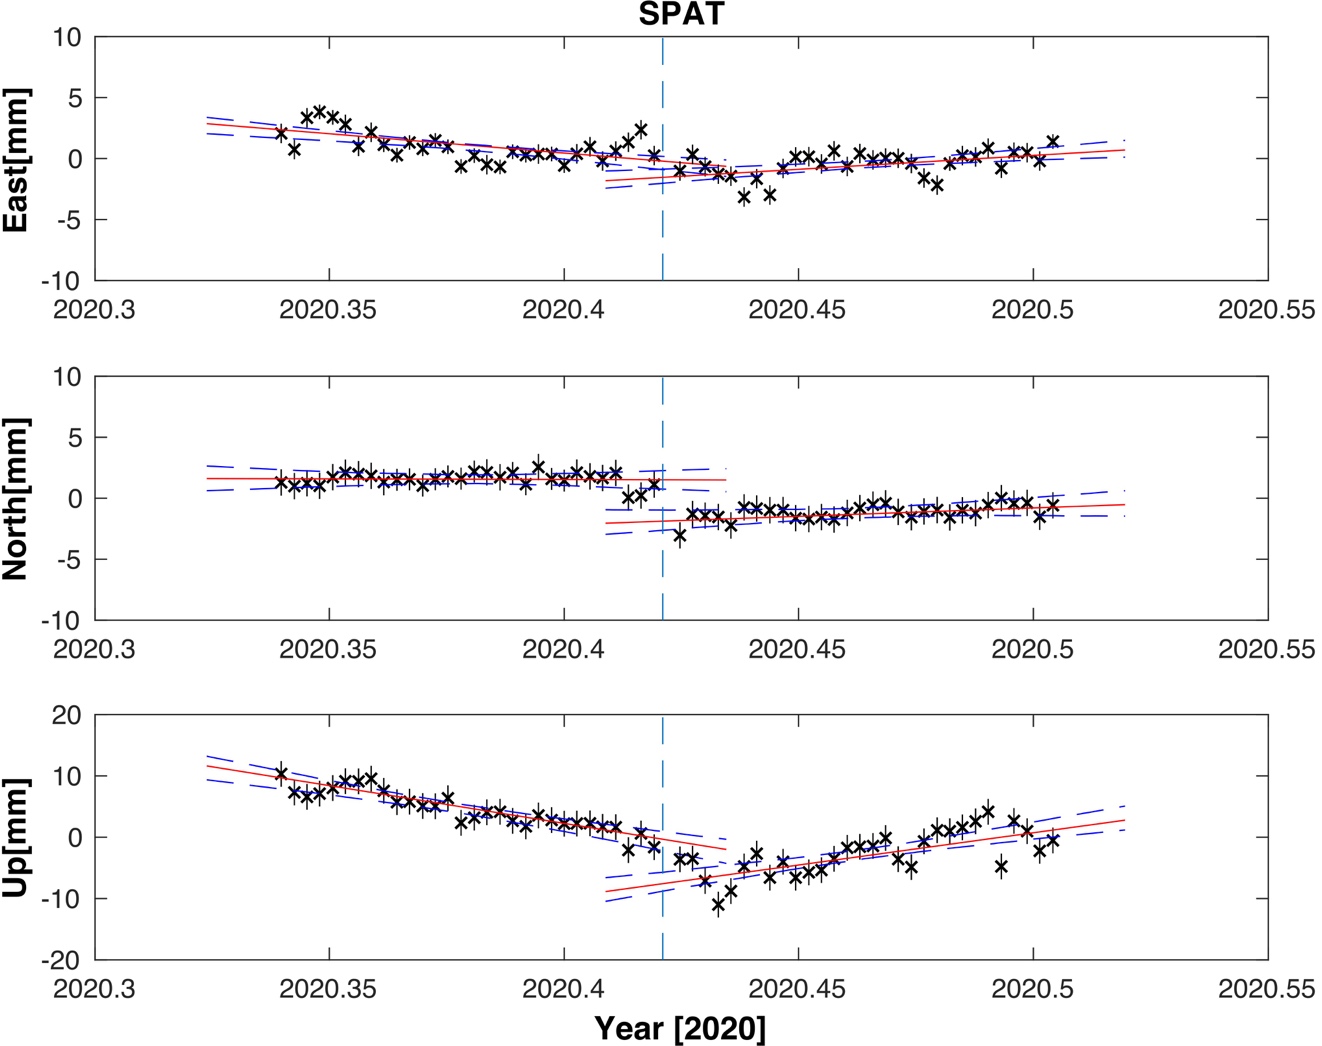


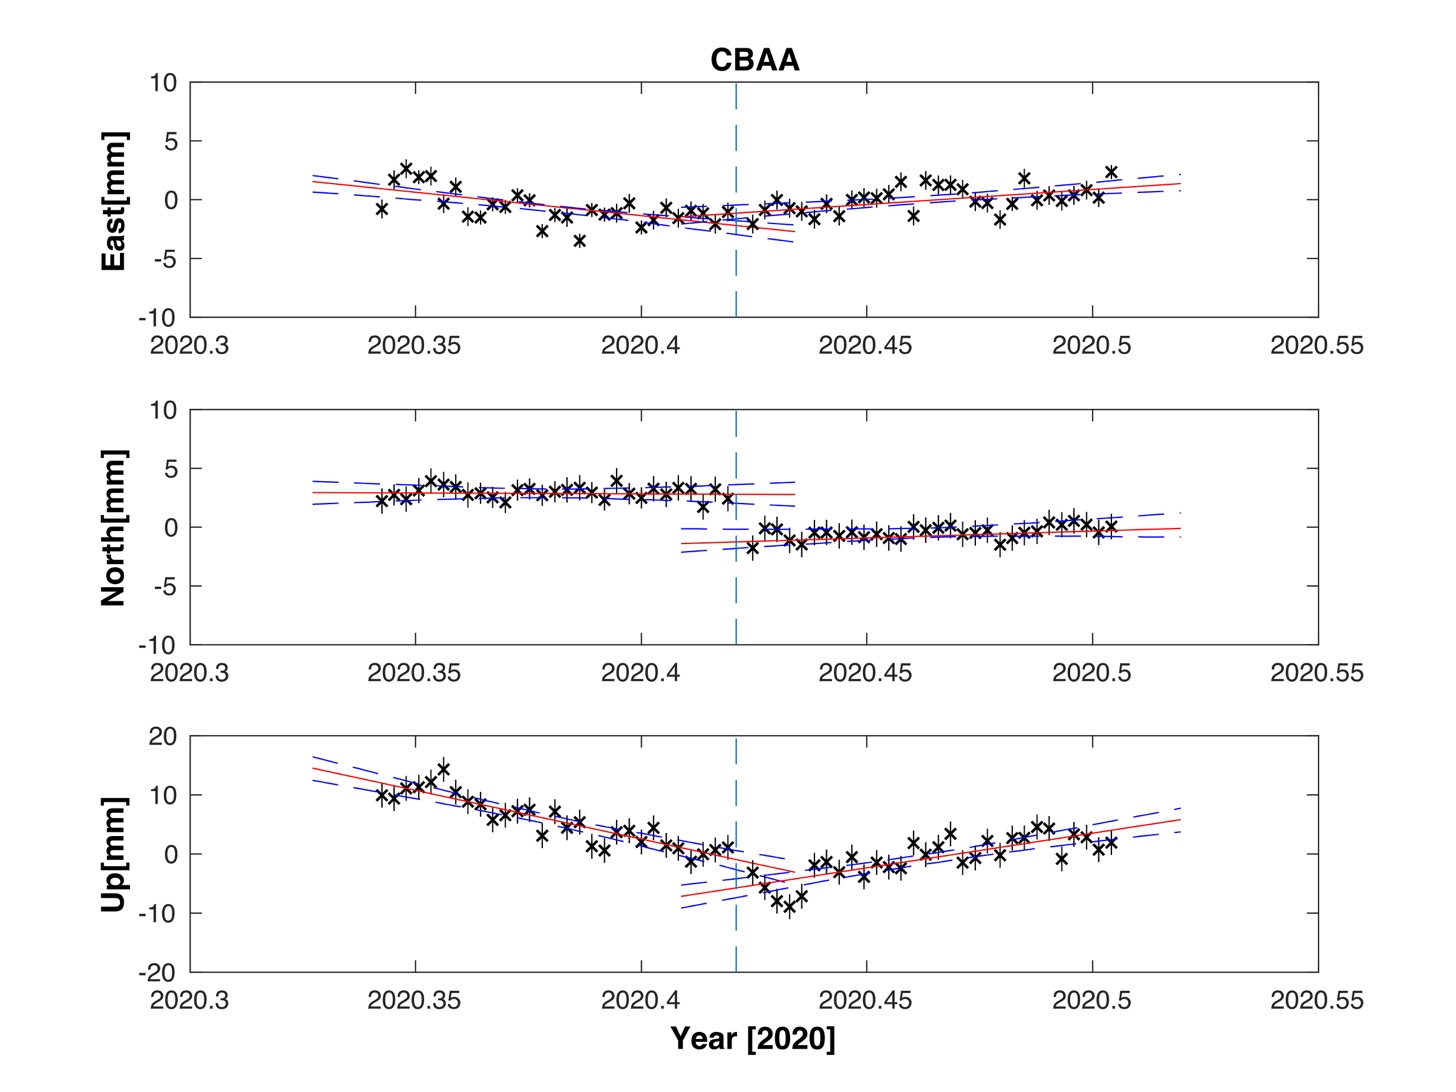


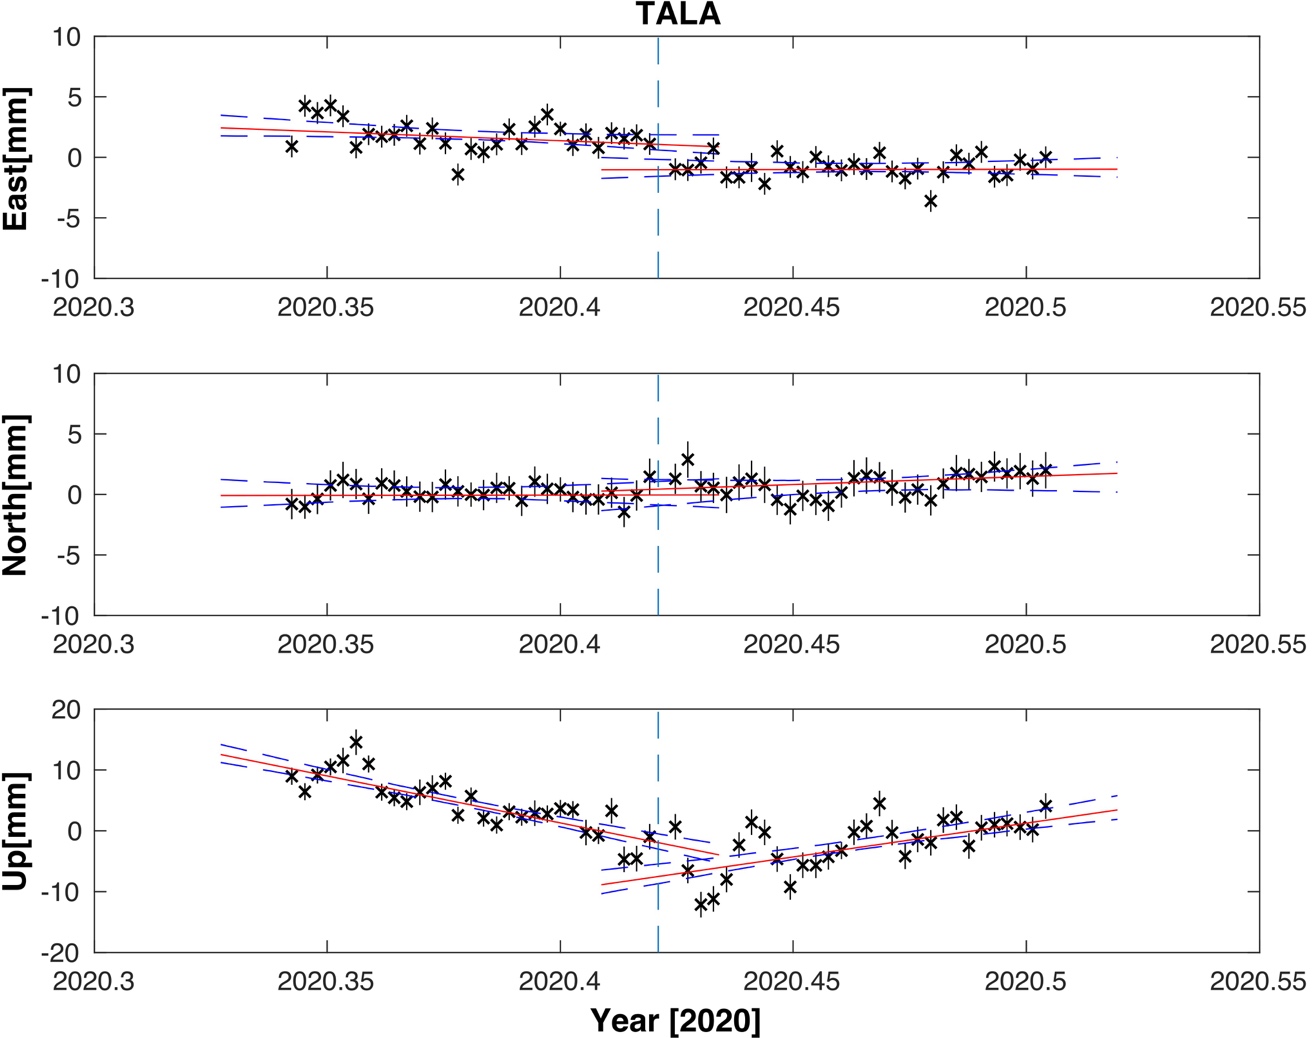


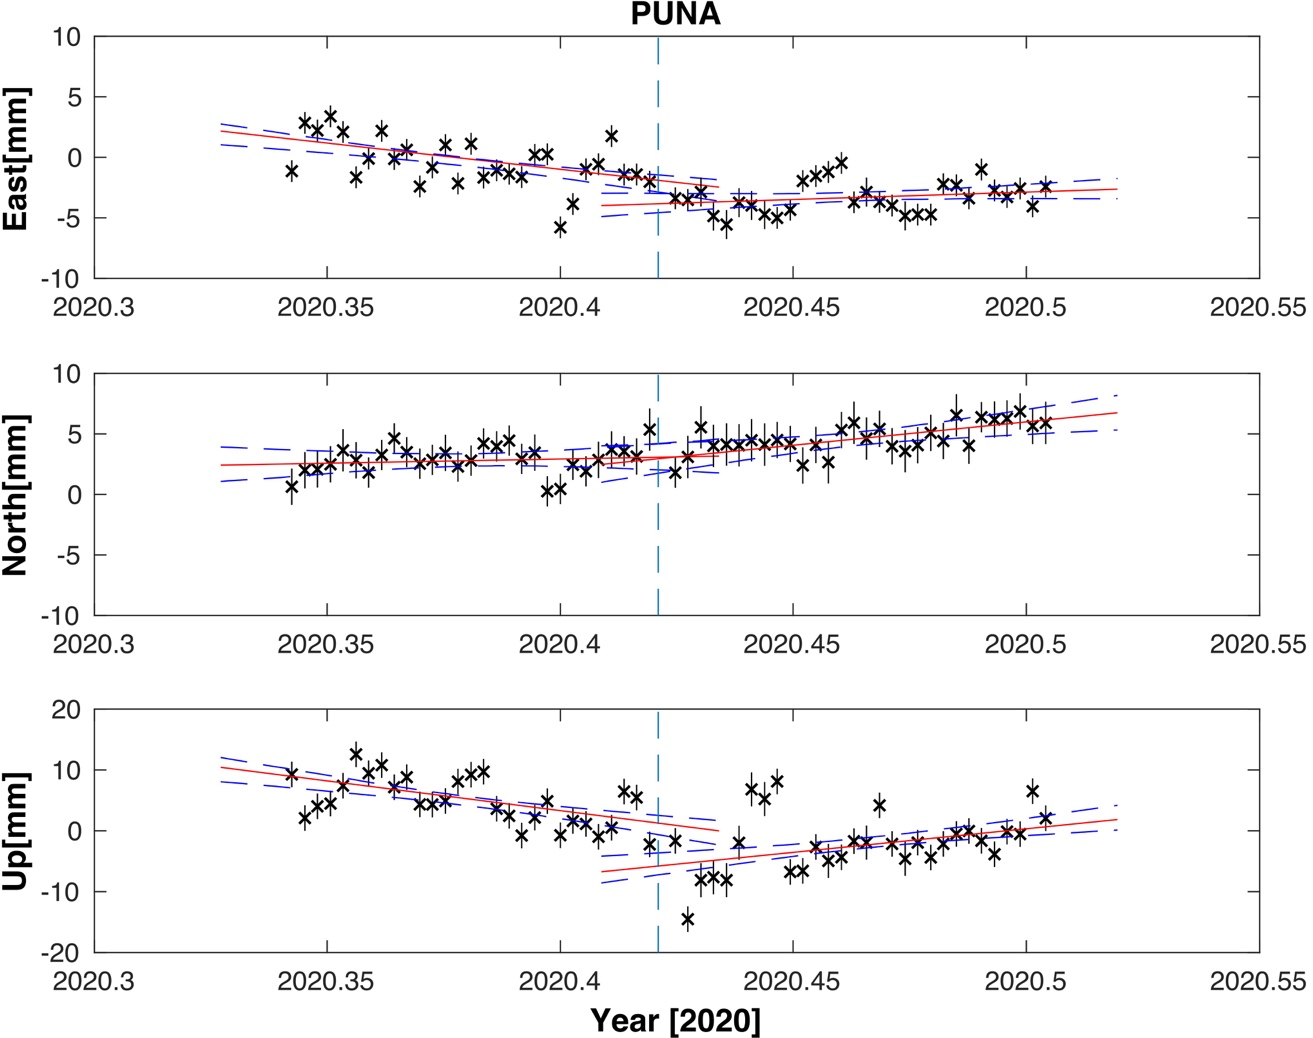


**Figure S1:** Figures are shown all the GPS time series 30 -days before and 30-days later the San Pedro Earthquake June 3, 2020 repeatability with errors, which we used to represent the East North and vertical deformation.


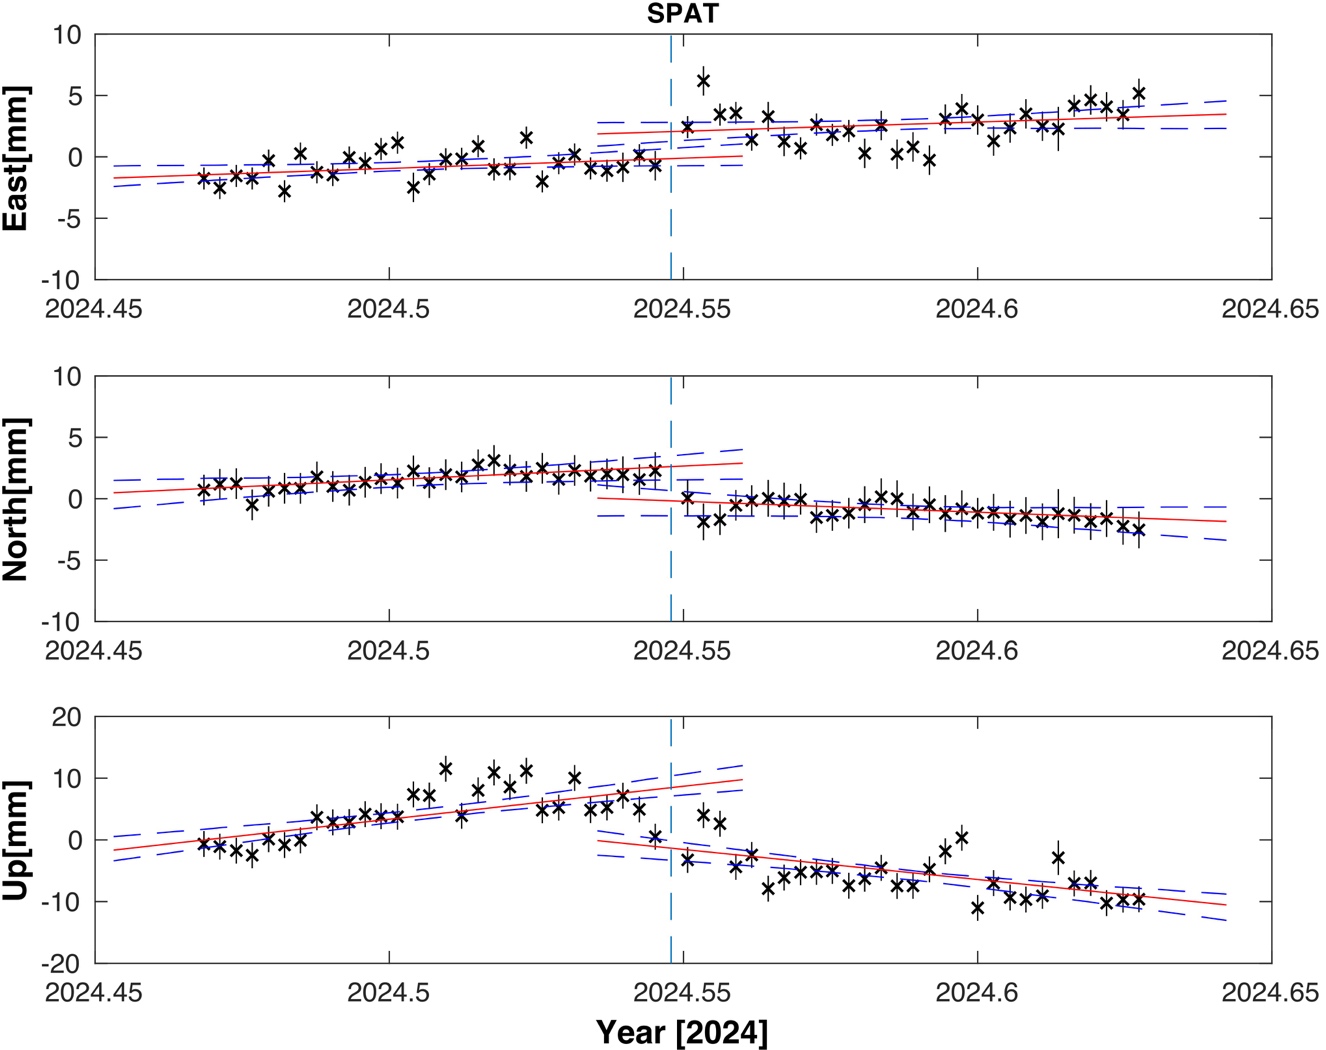


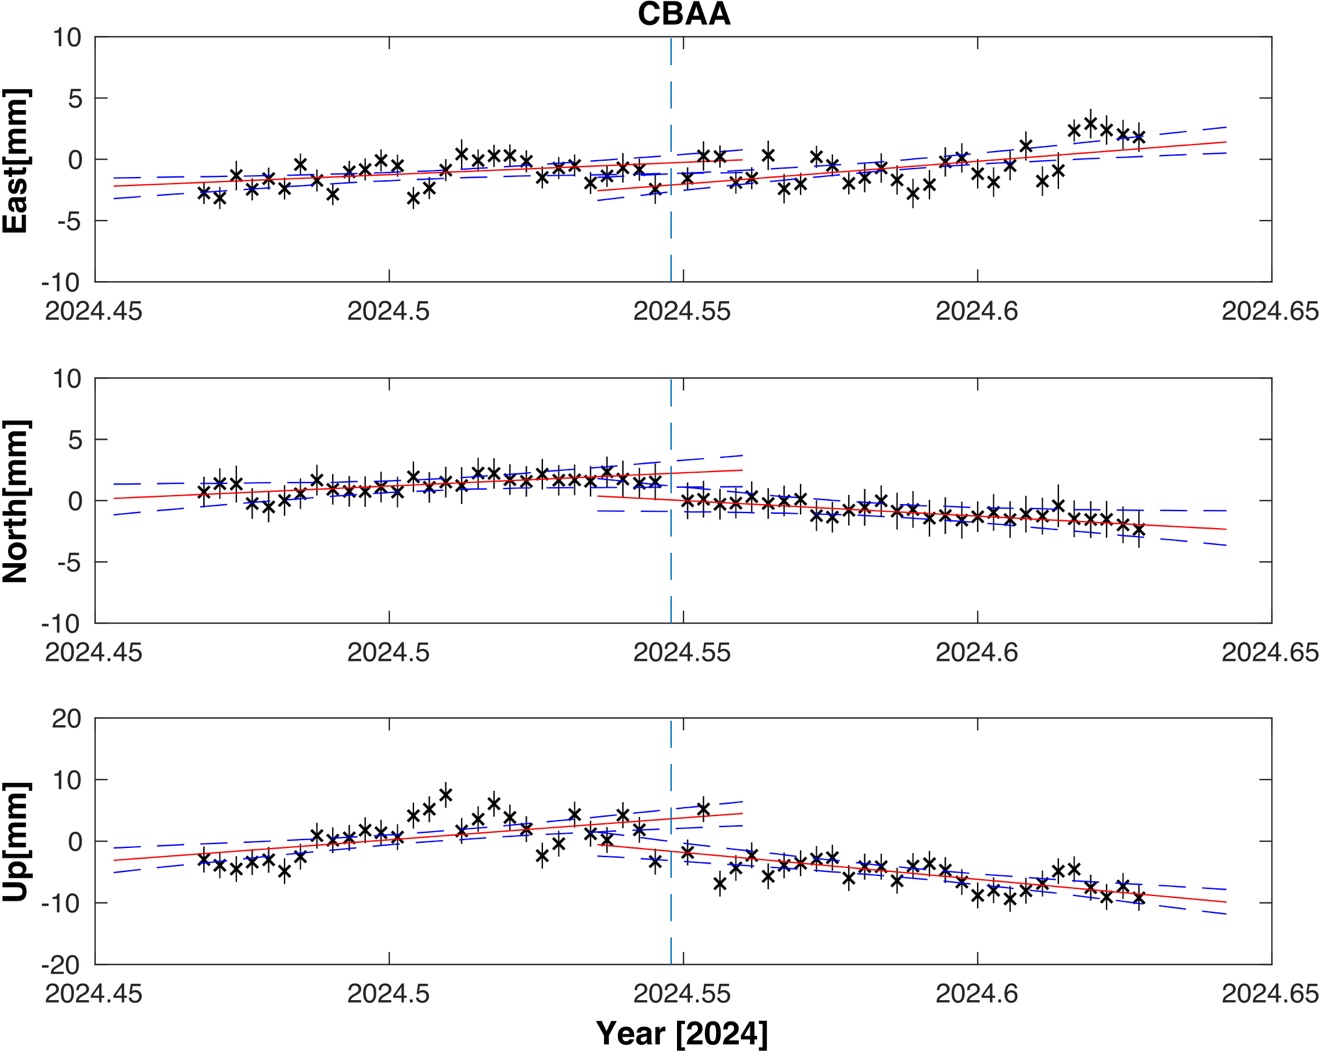


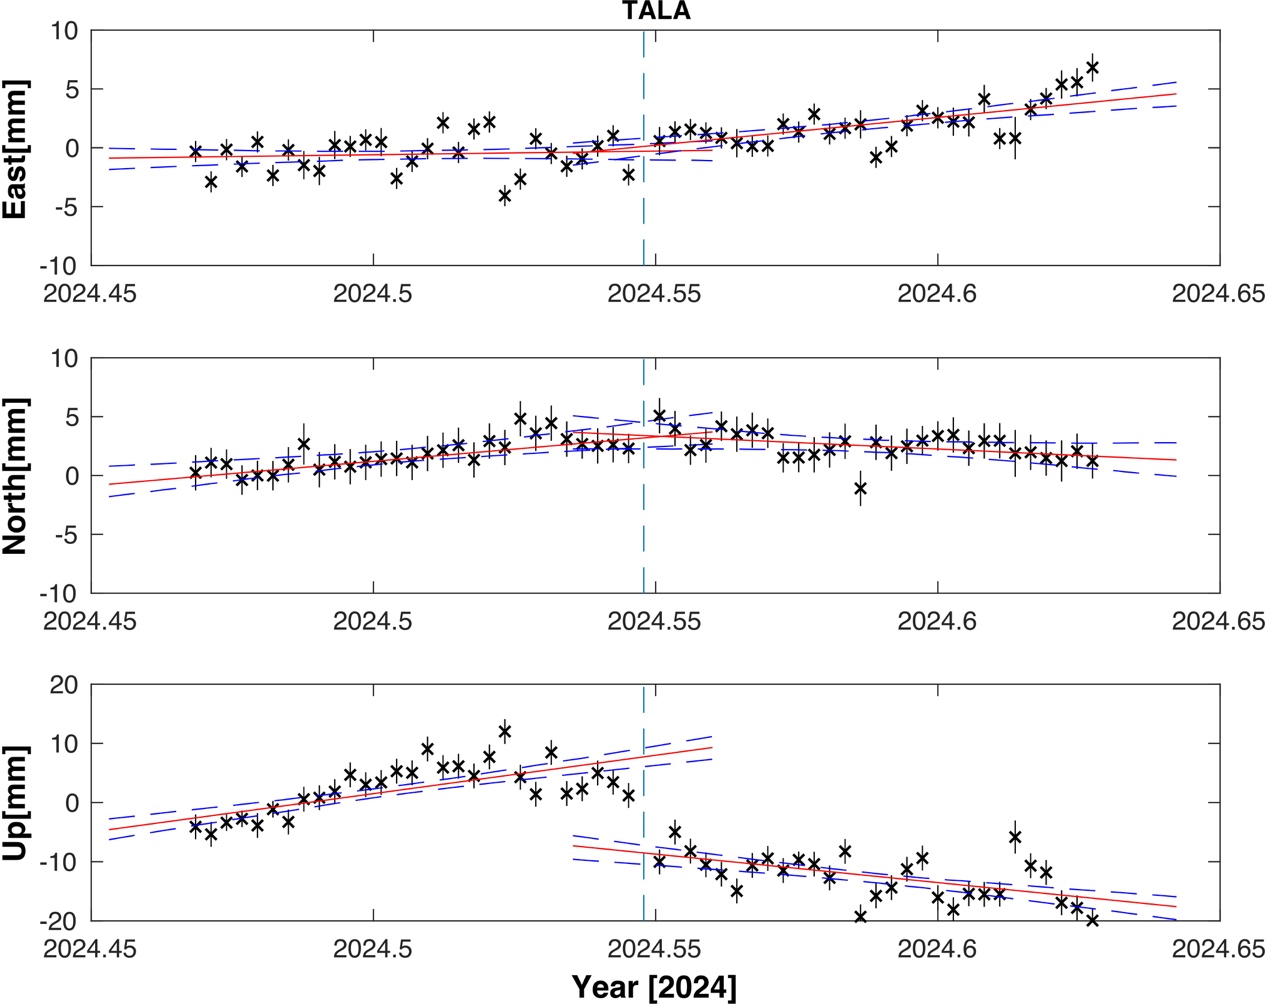


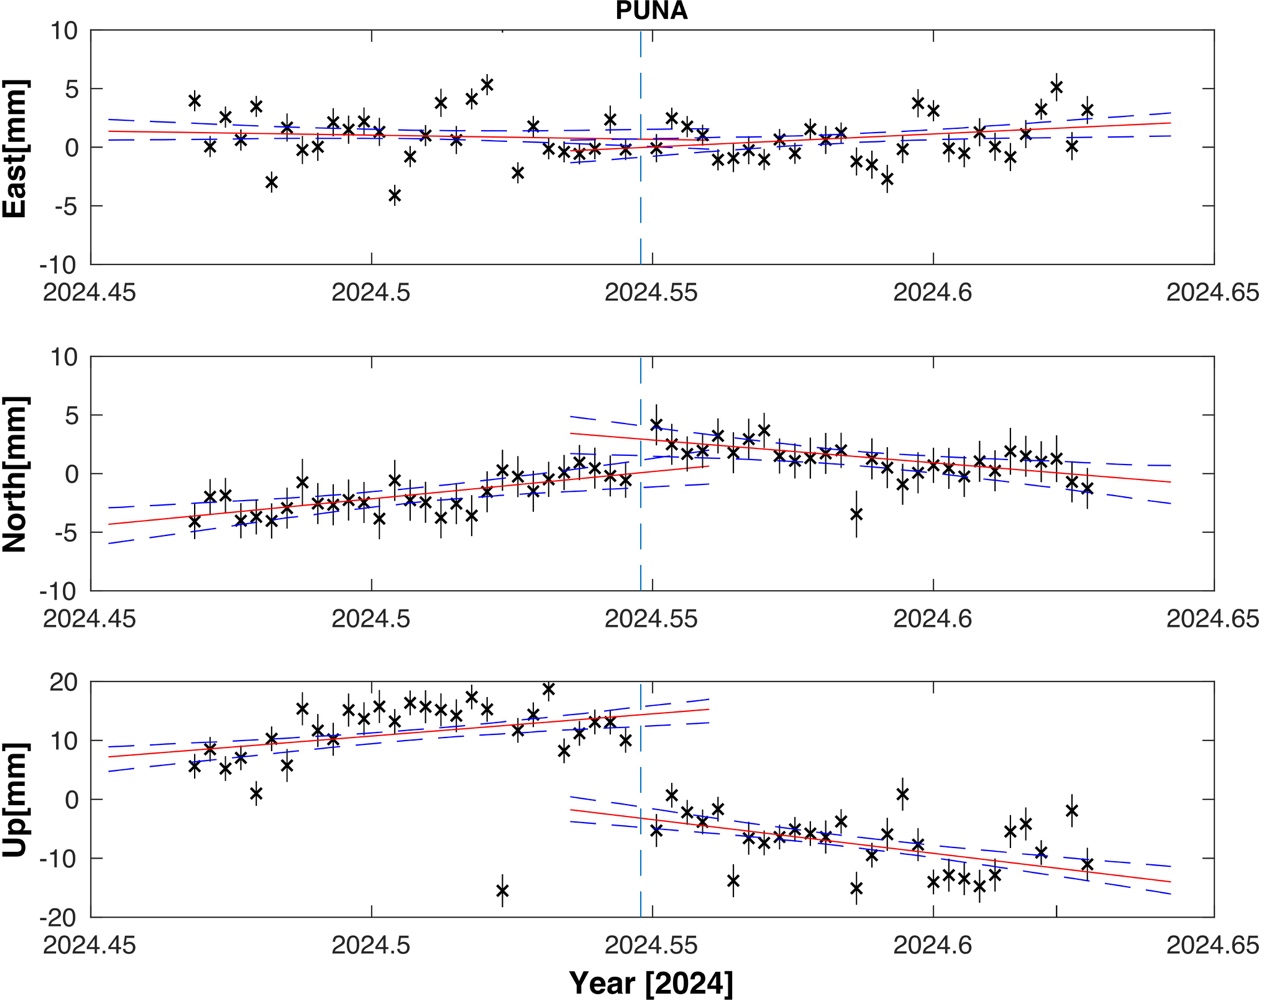


**Figure S2:** Figures are shown all the GPS time series 30 -days before and 30-days later the San Pedro Earthquake July 19, 2024 repeatability with errors, which we used to represent the East North and vertical deformation.


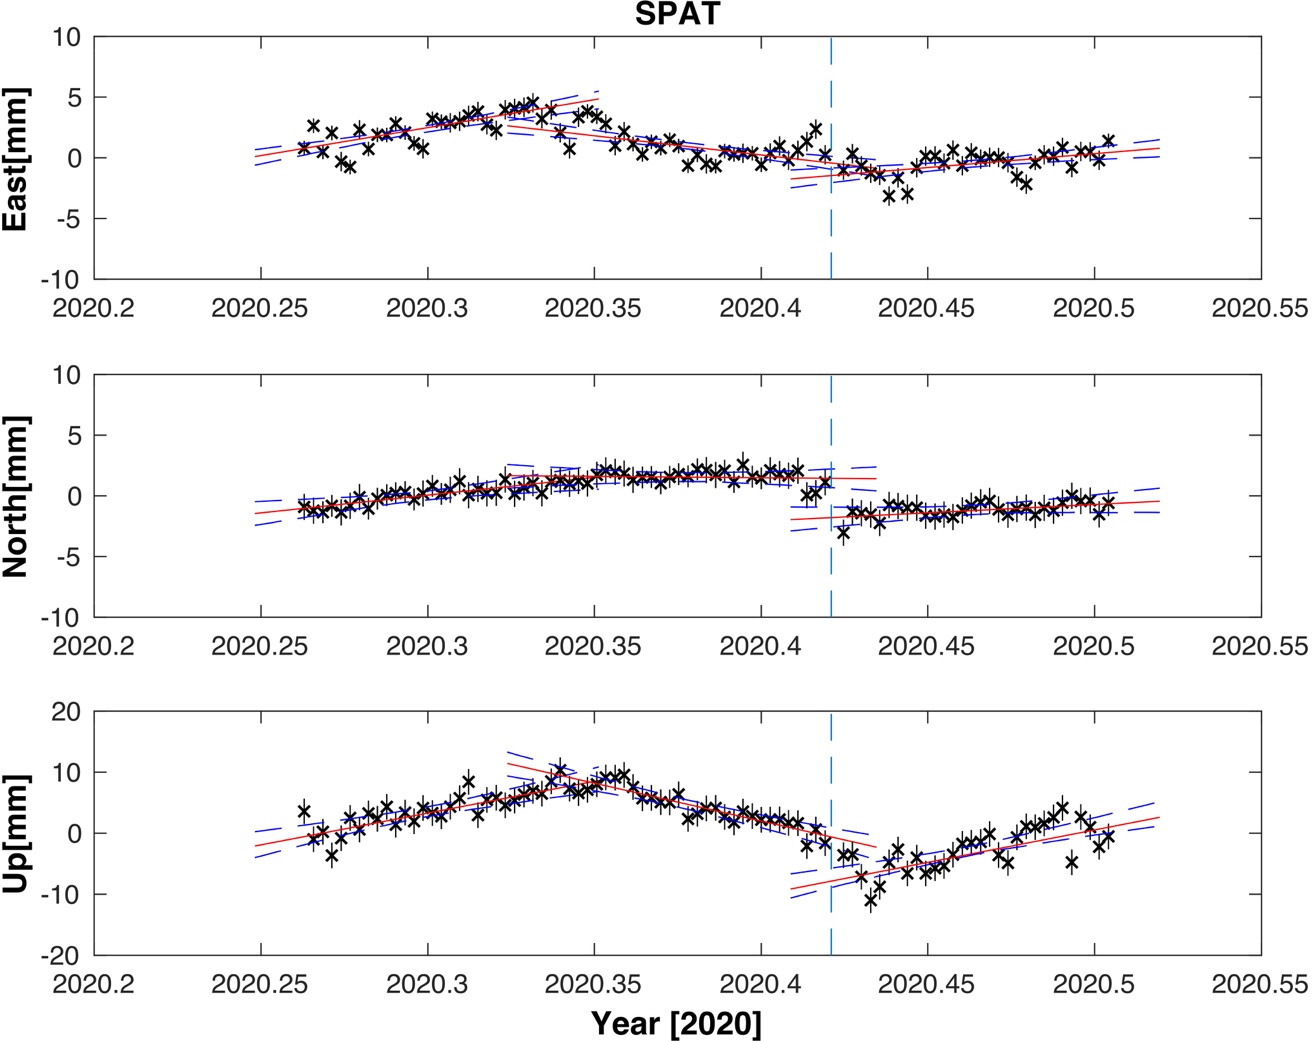


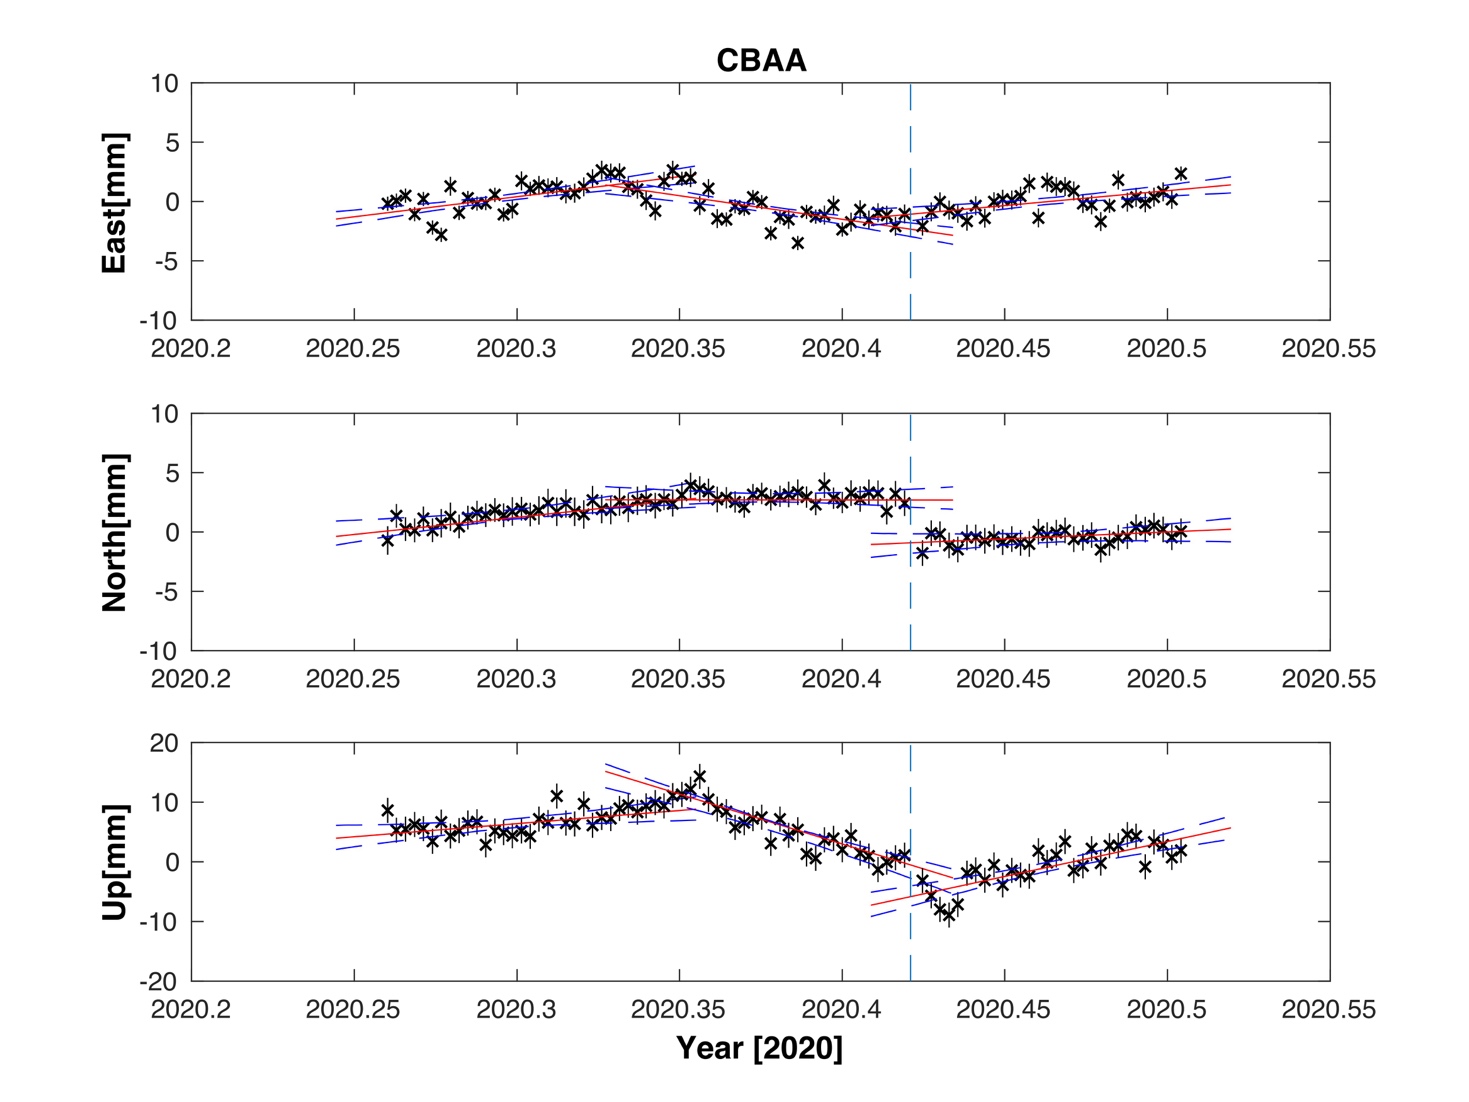


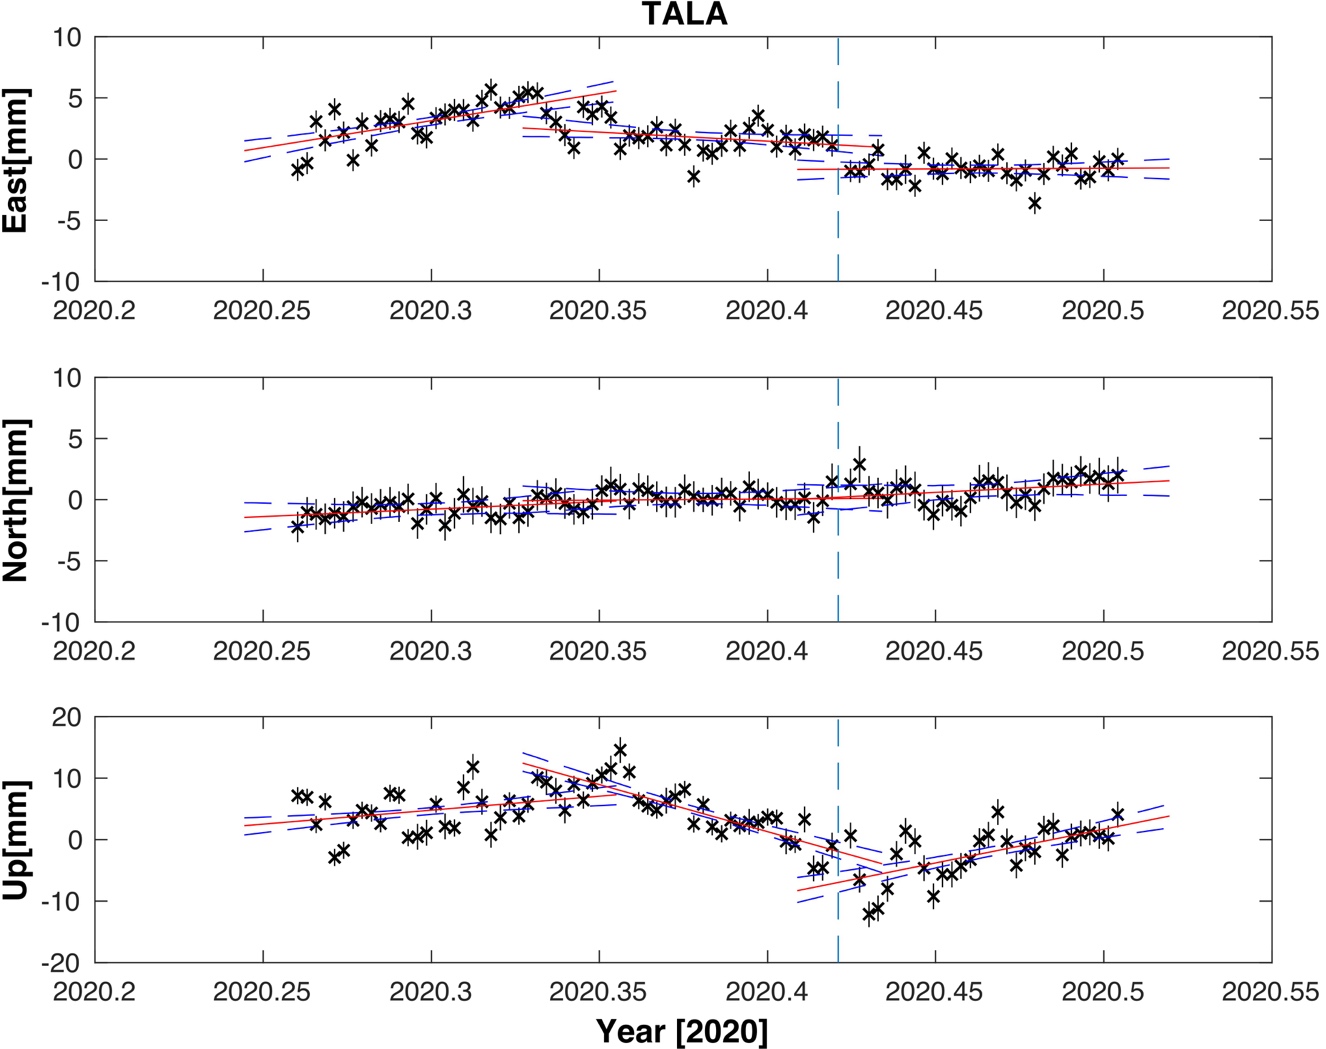


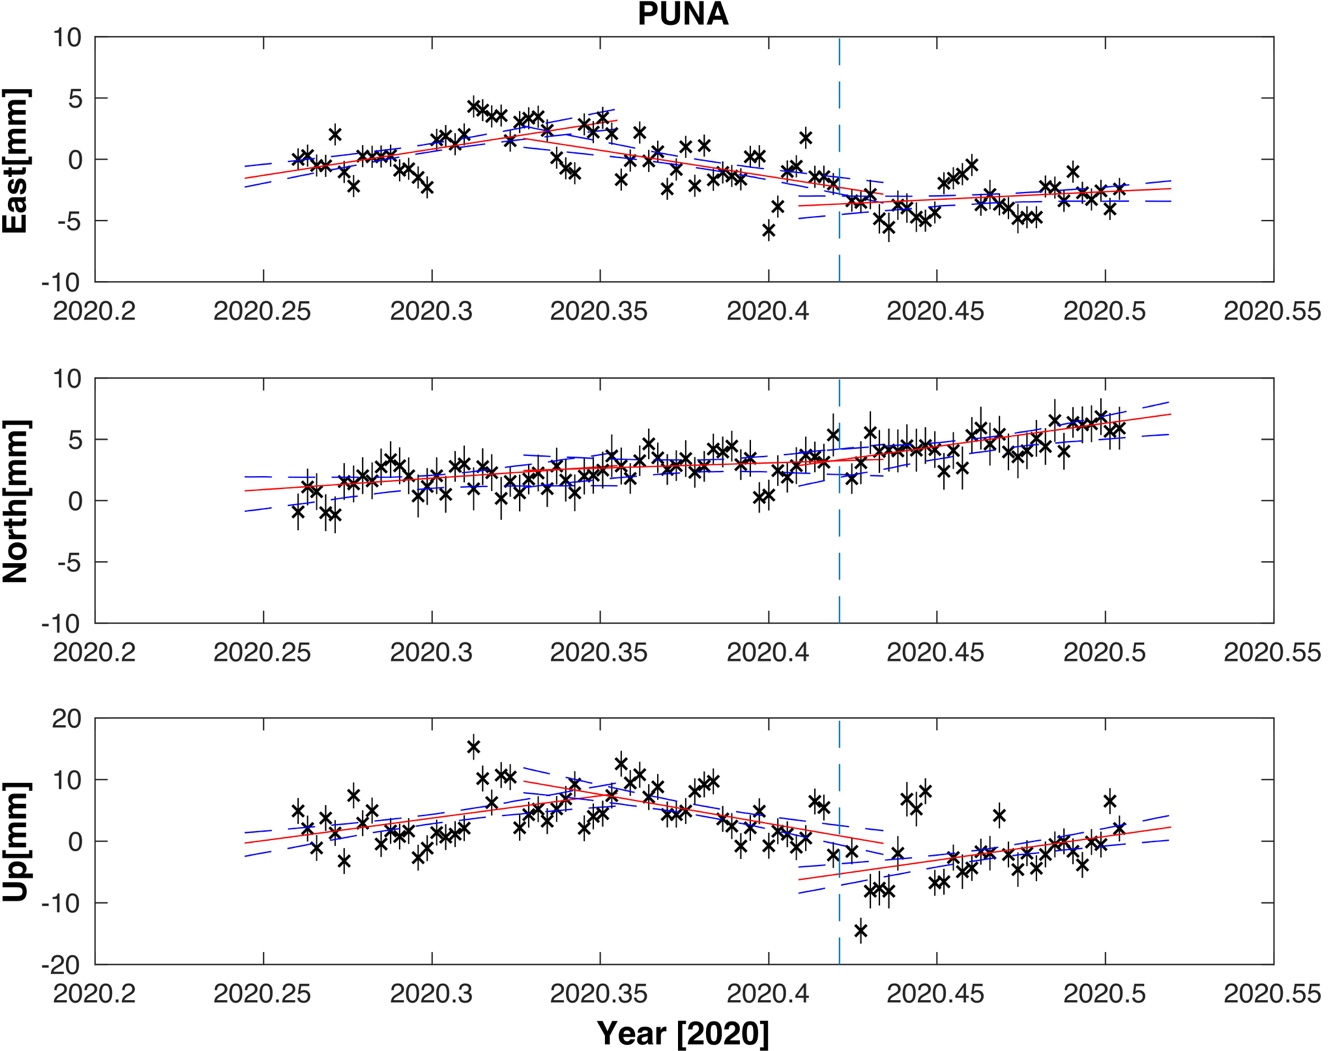


**Figure S3:** Figures are shown all the GPS time series 60 -days before and 30-days later the San Pedro Earthquake June 3, 2020 repeatability with errors, which we used to represent the East North and vertical deformation.


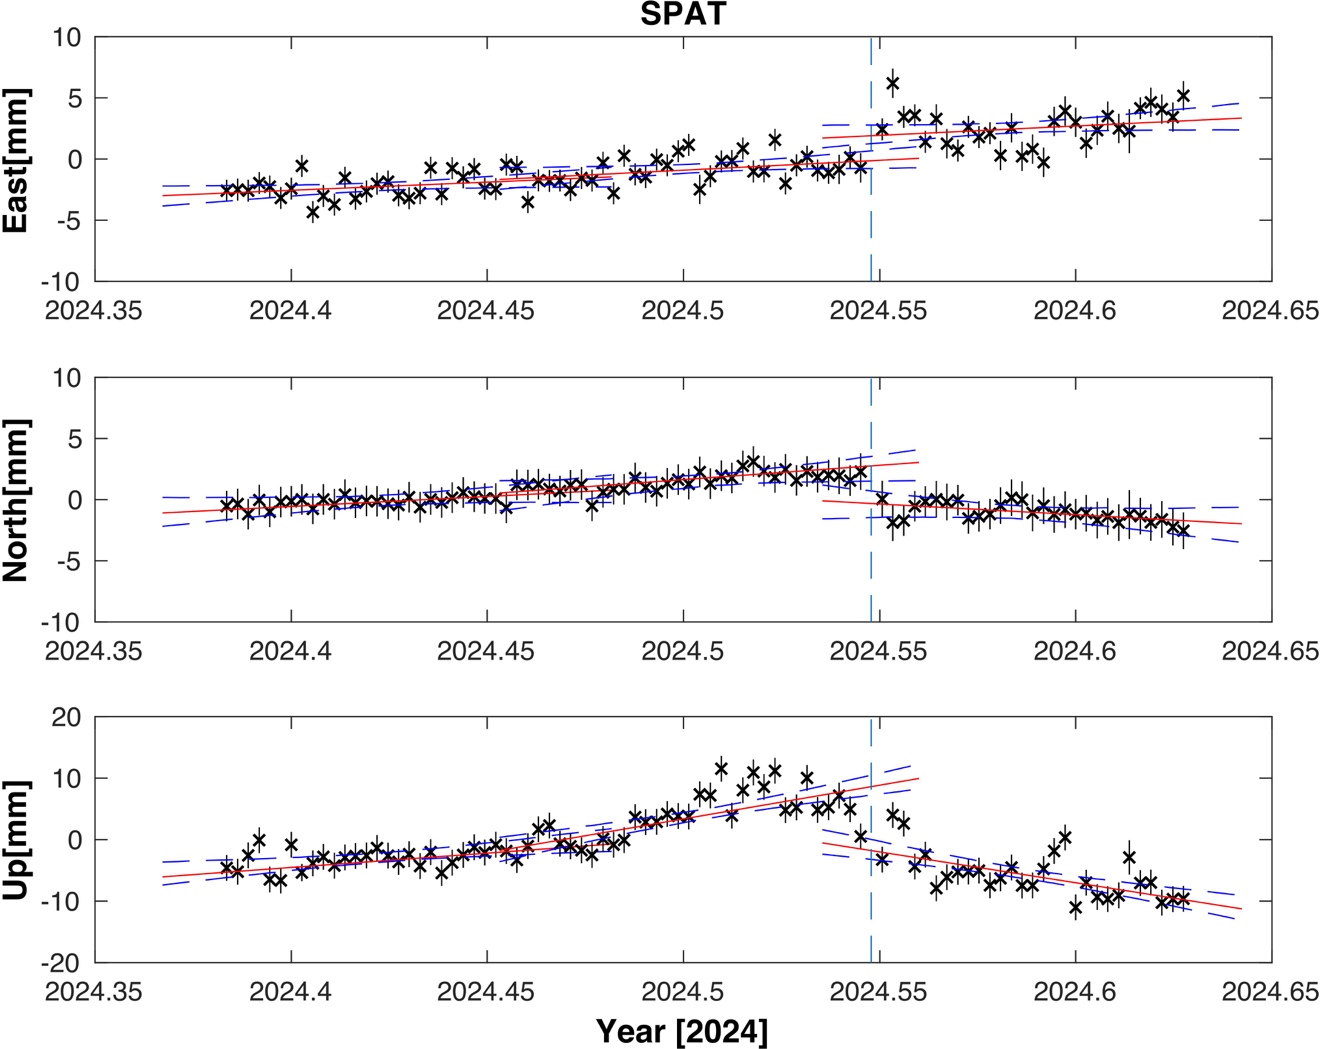


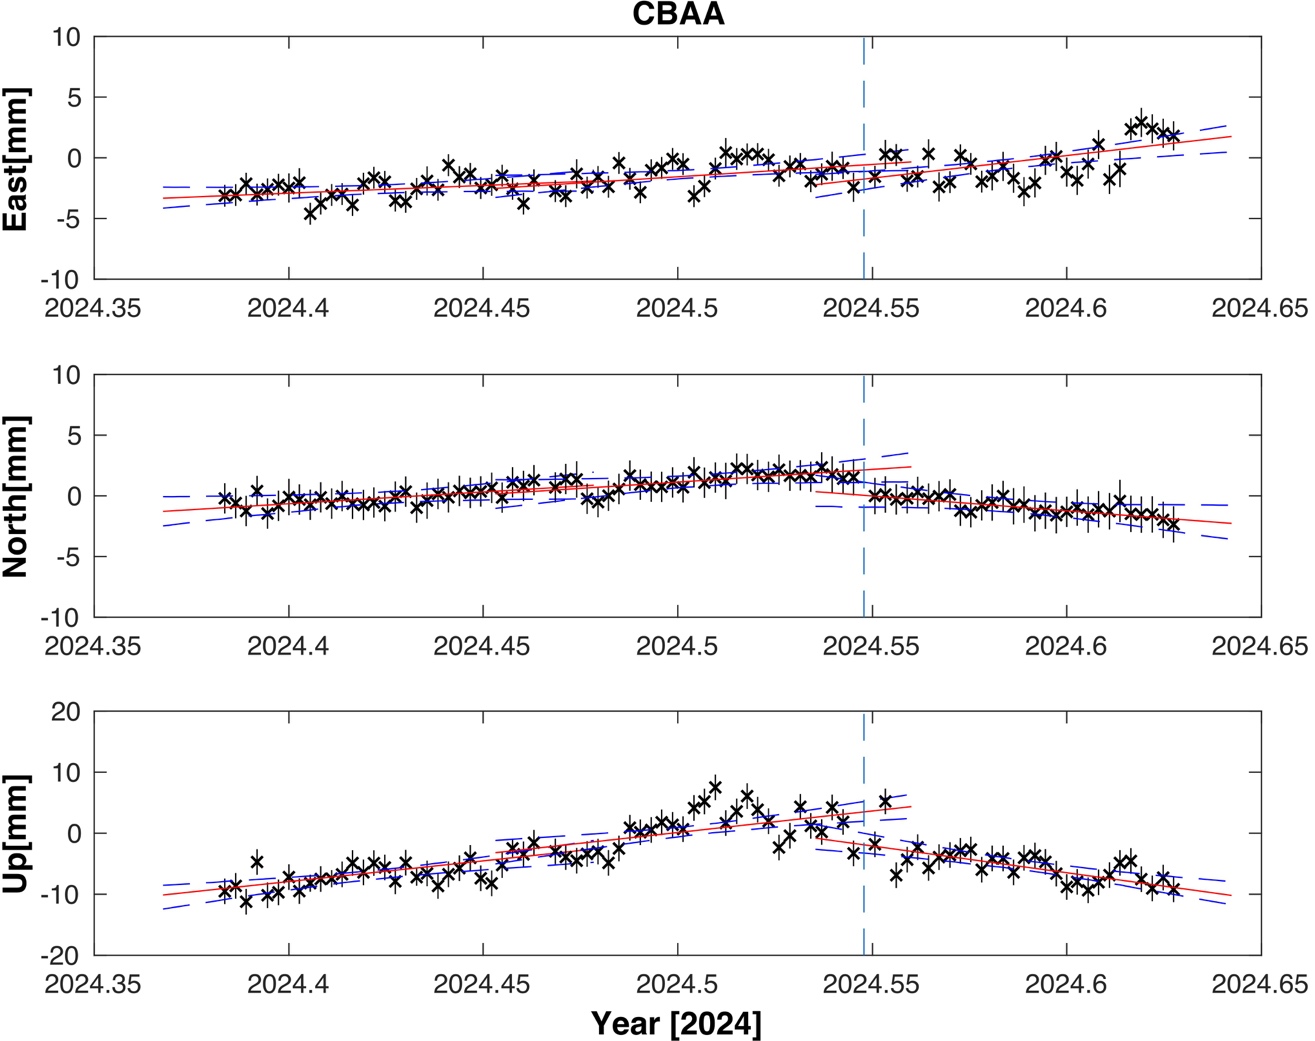


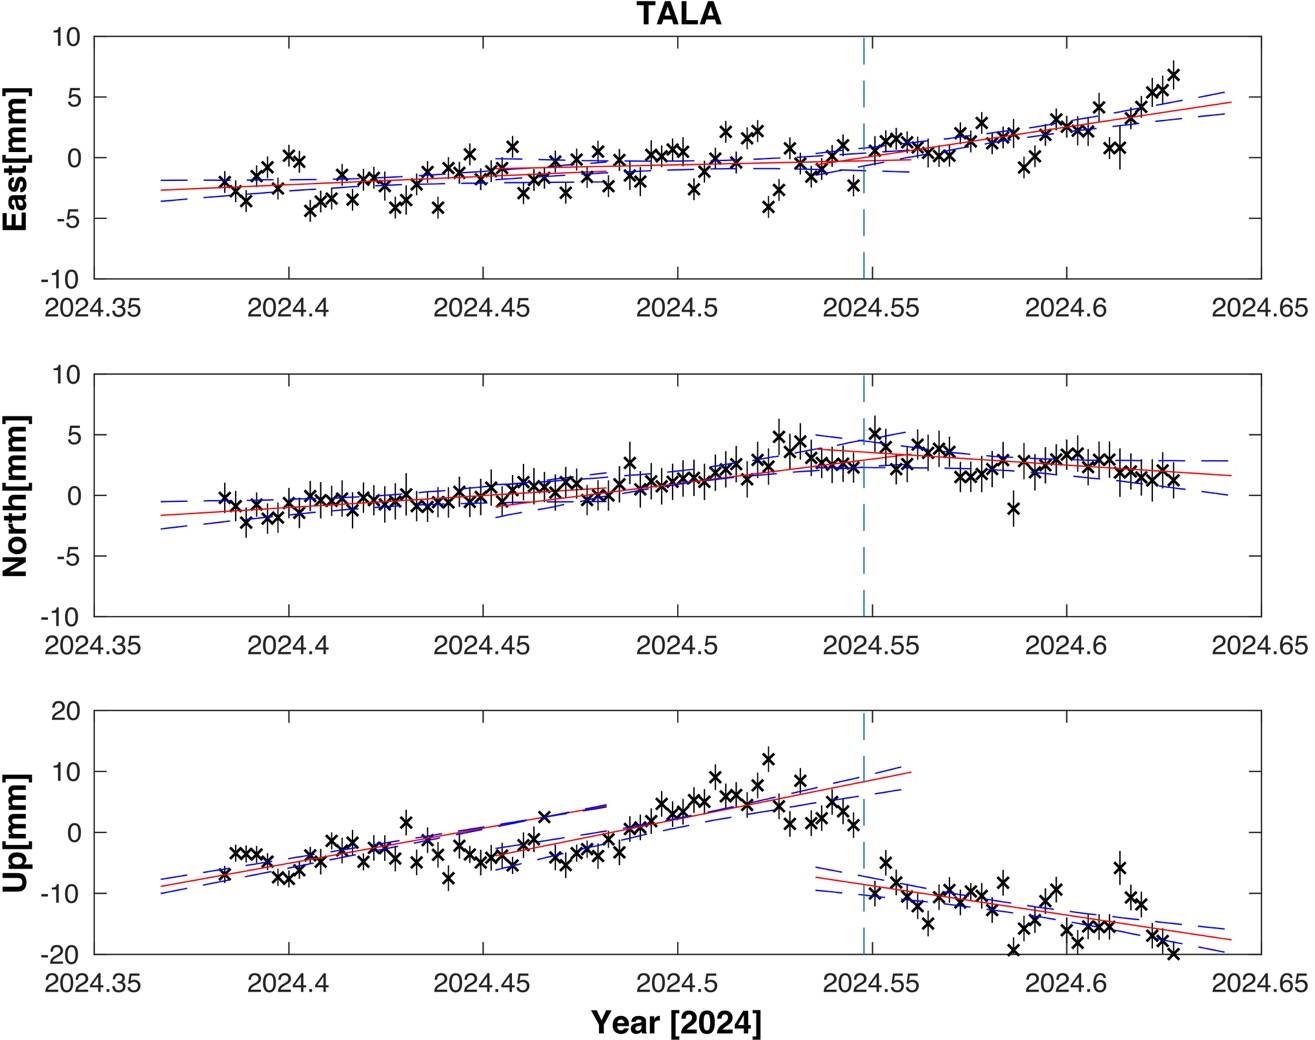


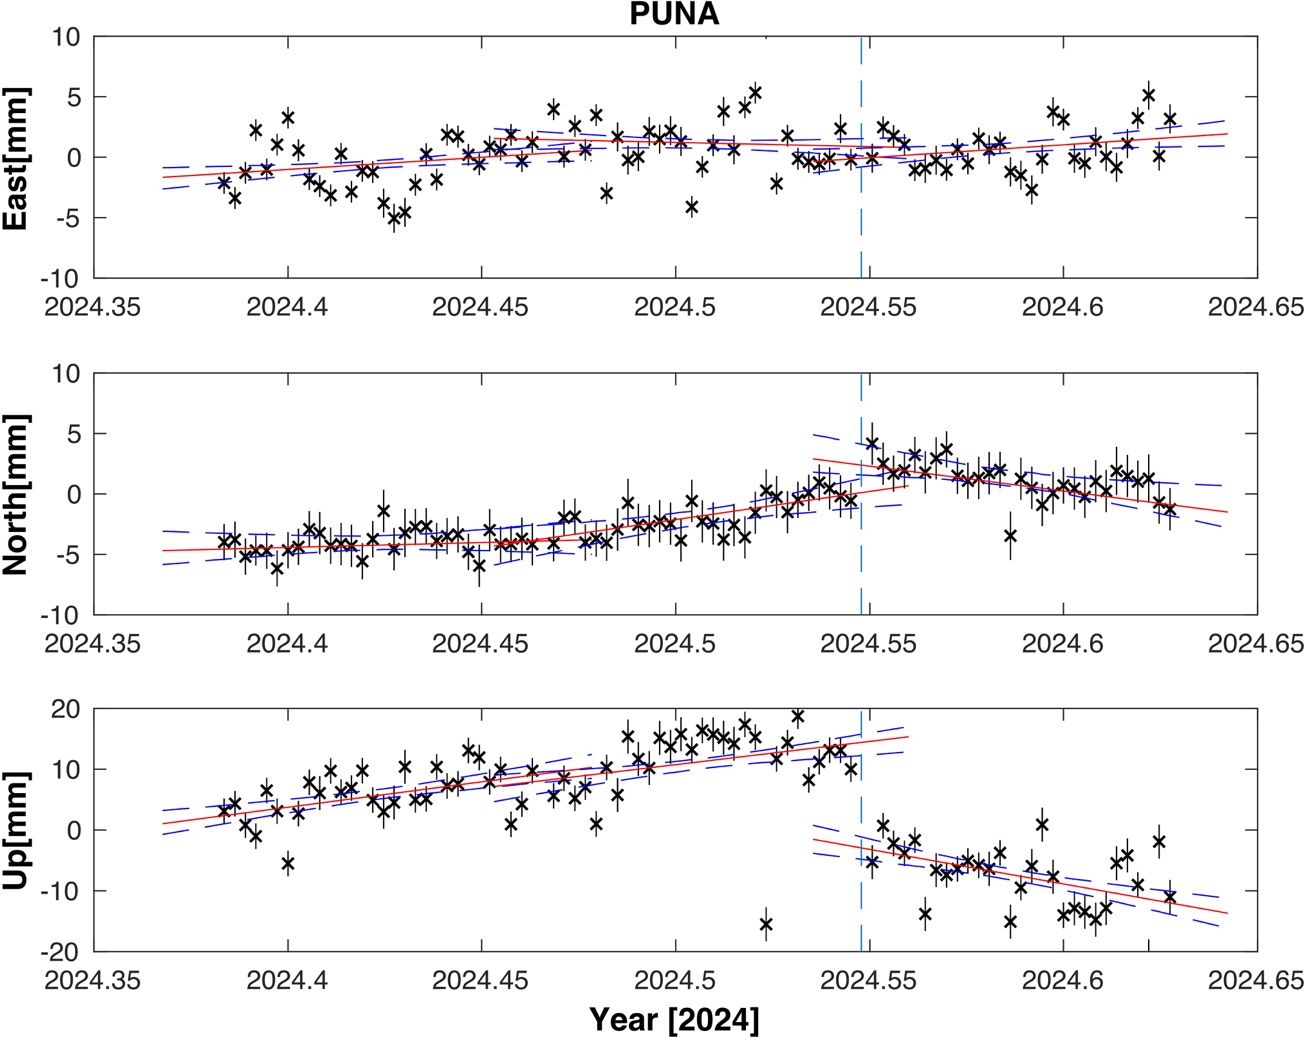


**Figure S4:** Figures are shown all the GPS time series 60 -days before and 30-days later the San Pedro Earthquake July 19, 2024 repeatability with errors, which we used to represent the East North and vertical deformation.

**Table S1: Distance from the epicentre of the San Pedro earthquake June 3, 2020**

| Sites Name | Longitude | Latitude | Distance(Km) |
| --- | --- | --- | --- |
| CBAA | -68.5481 | -22.6464 | 82 |
| SPAT | -68.3588 | -23.0421 | 50 |
| TALA | -67.8975 | -23.3112 | 81 |
| PUNA | -67.8418 | -23.4897 | 87 |

**Table S2: Distance from the epicentre of the San Pedro earthquake July 19, 2024**

| Sites Name | Longitude | Latitude | Distance(Km) |
| --- | --- | --- | --- |
| CBAA | -68.5481 | -22.6464 | 80 |
| SPAT | -68.3588 | -23.0421 | 39 |
| TALA | -67.8975 | -23.3112 | 21 |
| PUNA | -67.8418 | -23.4897 | 40 |
